# Supplementary material for: The atropisomeric dynamic behaviour of symmetrical N-acylated amine-bridged calix[4]arenes
Source: Royal Society of Chemistry journal article supplement (doi:10.1039/d2nj01533a), 2022-01-01
Supplement: d2nj01533a1.pdf [file d2nj01533a1.pdf]

## Supporting Information

### The Atropisomeric Dynamic Behaviour of Symmetrical *N*-acylated Amine-Bridged Calix[4]arenes

Martin Tlustý,<sup>†</sup> Václav Eigner,<sup>§</sup> Hana Dvořáková<sup>‡</sup> and Pavel Lhoták<sup>†\*</sup>

<sup>†</sup>Department of Organic Chemistry, University of Chemistry and Technology, Prague (UCTP), Technická 5, 166 28 Prague 6, Czech Republic

<sup>§</sup>Department of Solid State Chemistry, UCTP, Technická 5, 166 28 Prague 6, Czech Republic

<sup>‡</sup>Laboratory of NMR Spectroscopy, UCTP, Technická 5, 166 28 Prague 6, Czech Republic.

#### Table of Contents

|                                                |    |
|------------------------------------------------|----|
| 1. Spectral characterization of compounds..... | 2  |
| 2. Dynamic NMR measurements .....              | 18 |
| 3. Crystallographic data .....                 | 22 |
| 4. Titration experiments .....                 | 23 |
| 5. Theoretical calculations .....              | 28 |

# 1. Spectral characterization of compounds

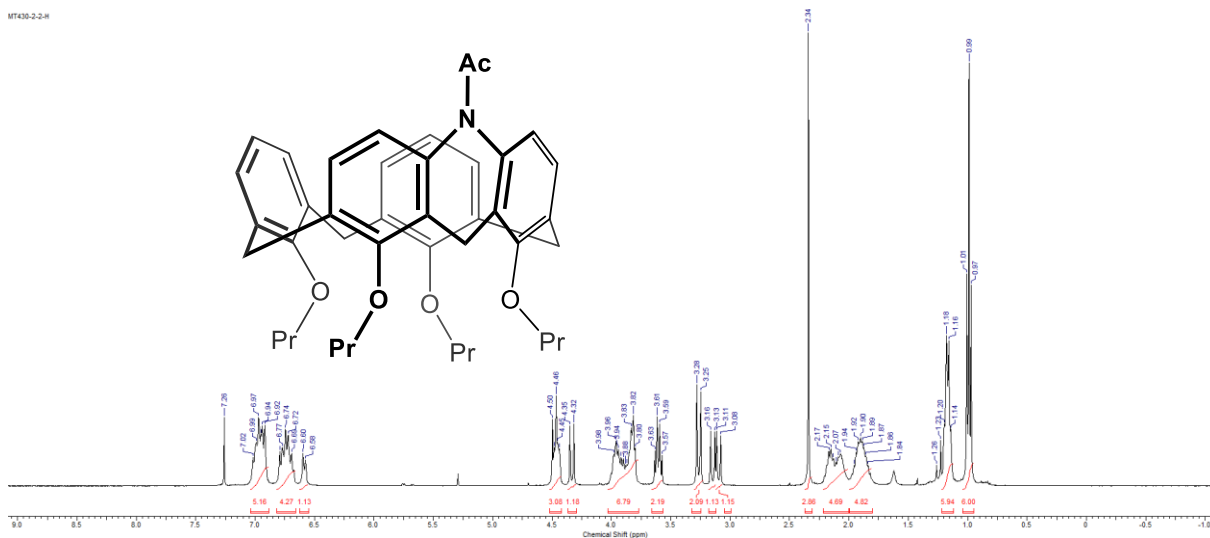

Figure S1:  $^1\text{H}$  NMR of compound 7a ( $\text{CDCl}_3$ , 400 MHz).

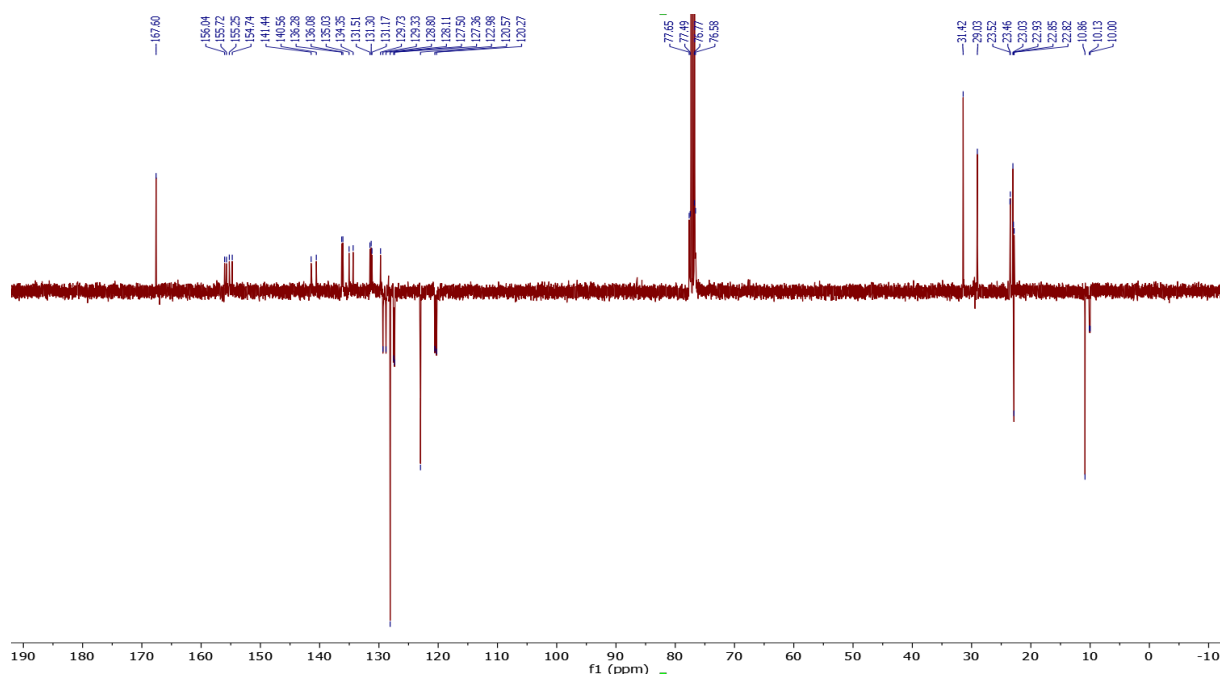

Figure S2:  $^{13}\text{C}$ (APT) NMR of compound 7a ( $\text{CDCl}_3$ , 100 MHz).

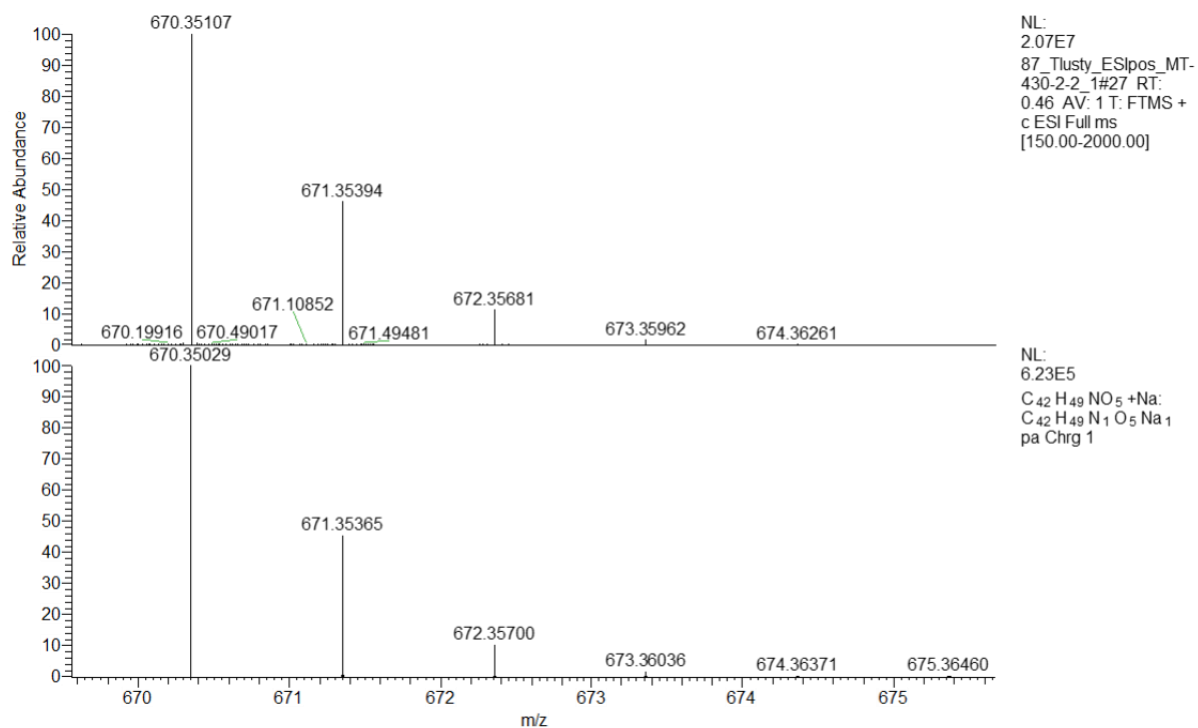

**Figure S3:** HRMS of compound **7a** (ESI<sup>+</sup>).

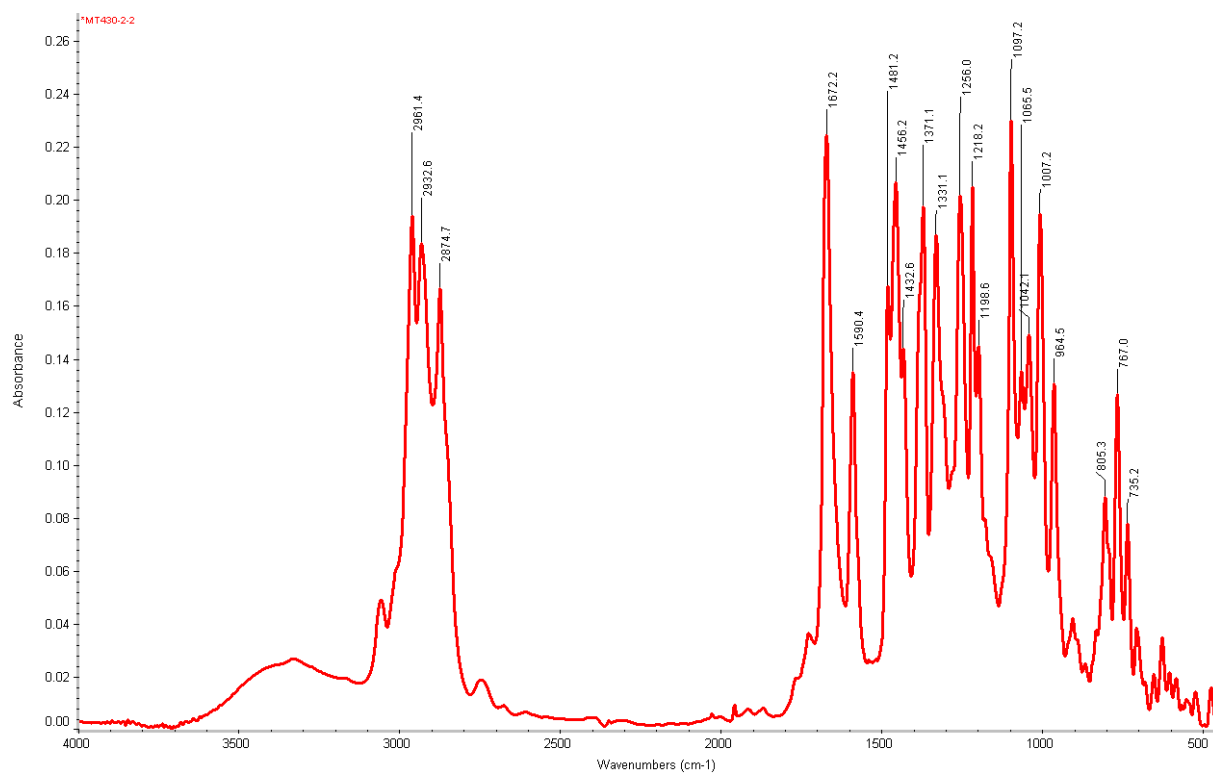

**Figure S4:** IR of compound **7a** (KBr).

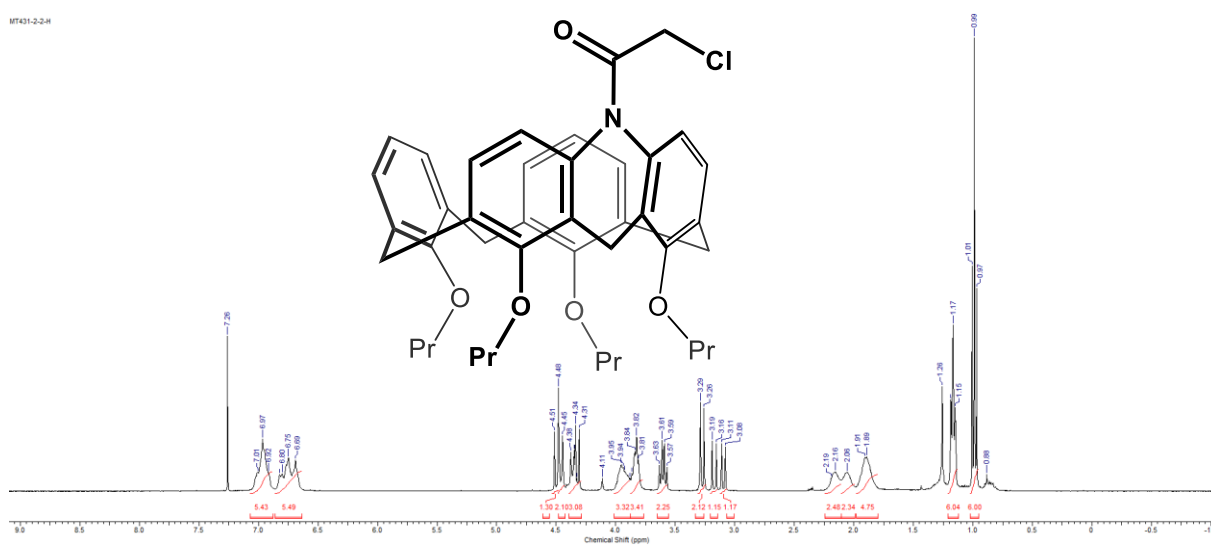

**Figure S5:**  $^1\text{H}$  NMR of compound **7b** (CDCl<sub>3</sub>, 400 MHz).

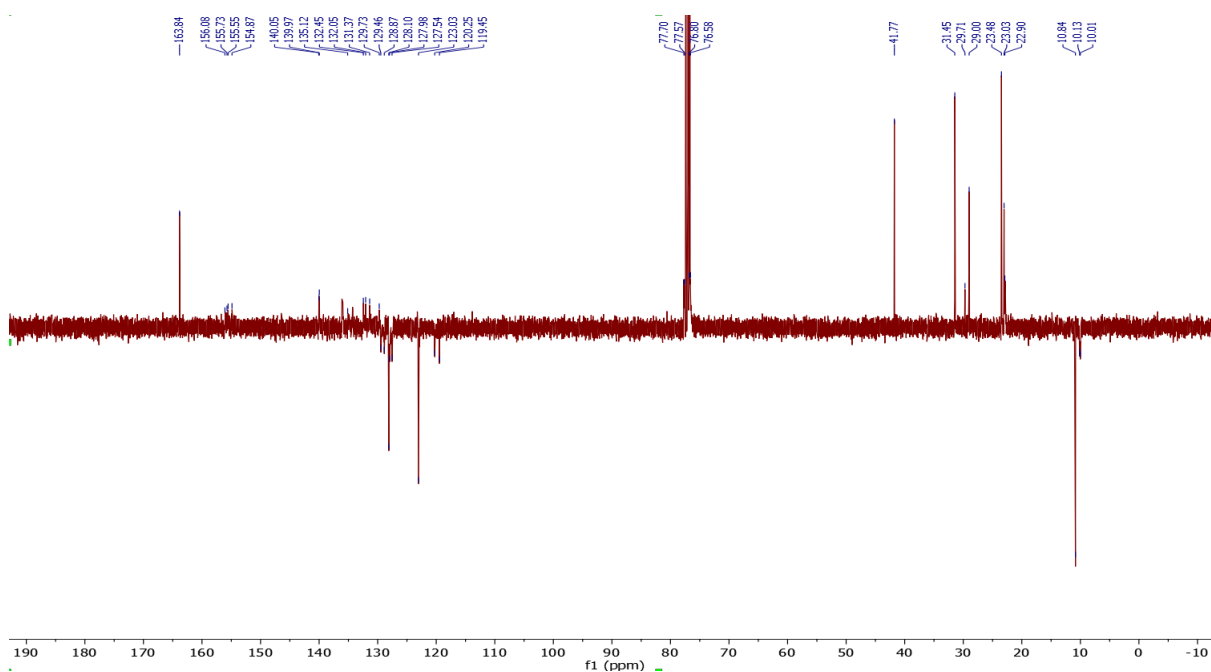

**Figure S6:**  $^{13}\text{C}$ (APT) NMR of compound **7b** (CDCl<sub>3</sub>, 100 MHz).

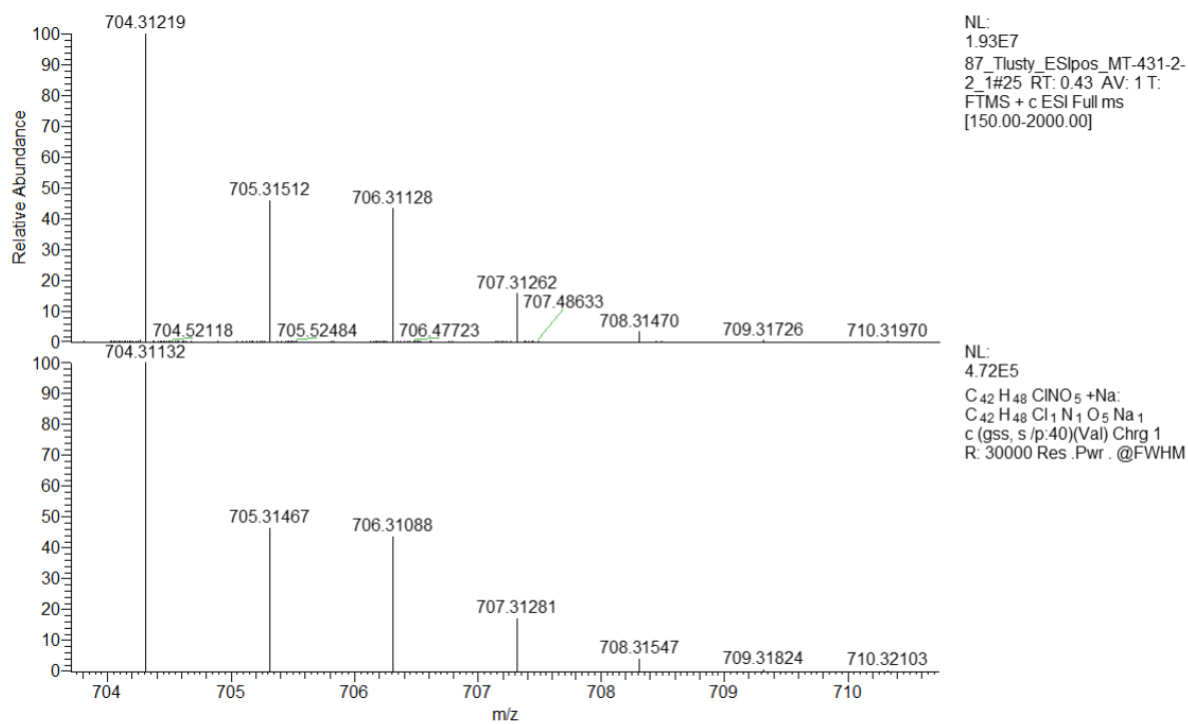

**Figure S7:** HRMS of compound **7b** (ESI<sup>+</sup>).

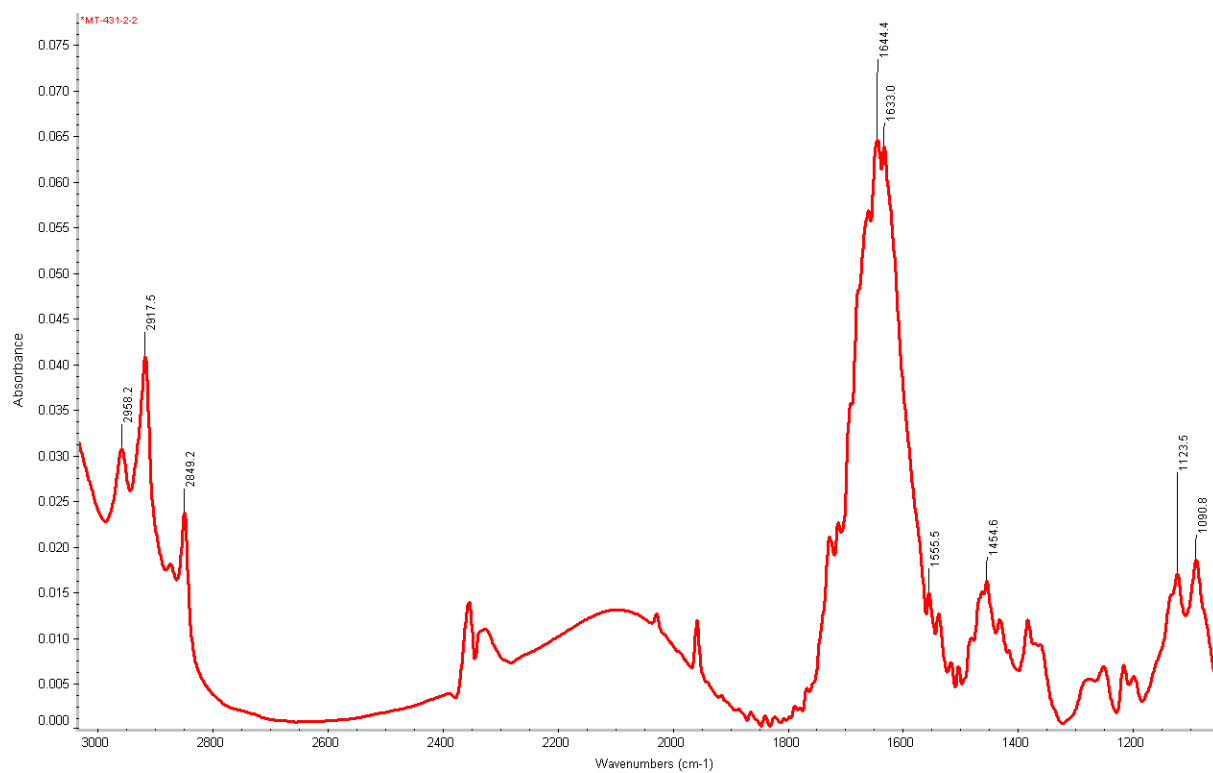

**Figure S8:** IR of compound **7b** (KBr).

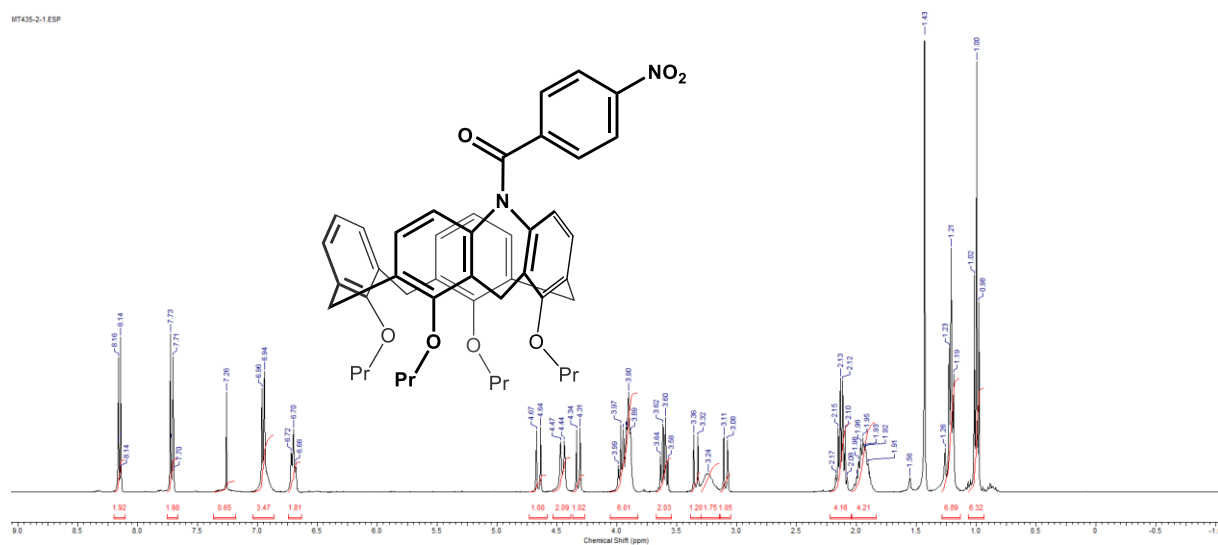

**Figure S9:**  $^1\text{H}$  NMR of compound 7c (CDCl<sub>3</sub>, 400 MHz).

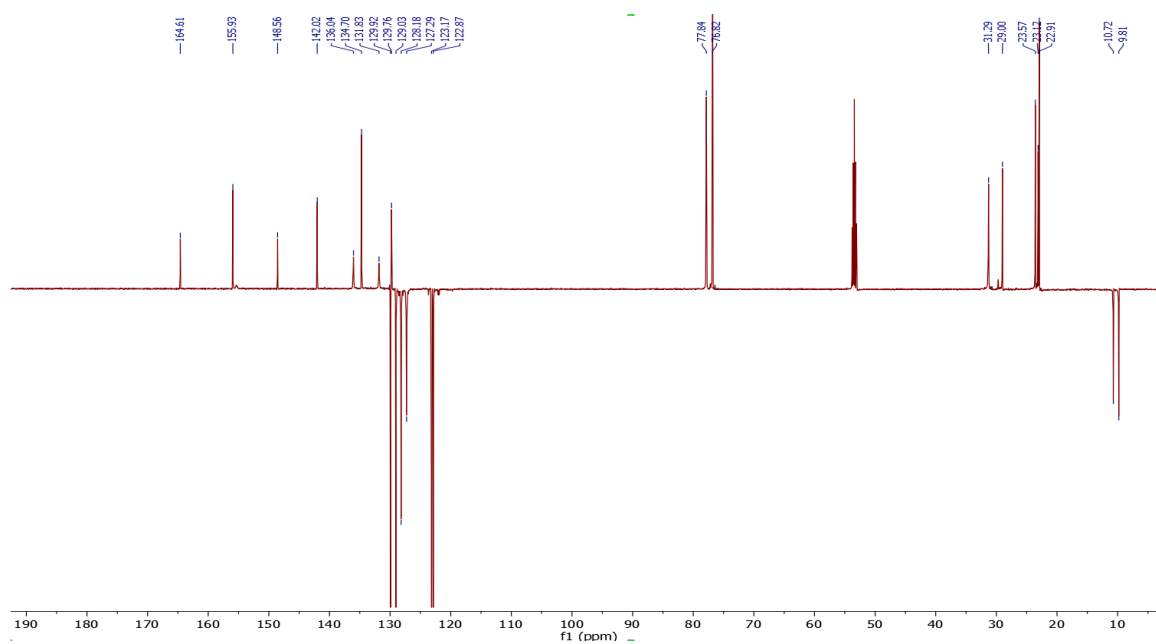

**Figure S10:**  $^{13}\text{C}$  (APT) NMR of compound 7c (CDCl<sub>3</sub>, 100 MHz).

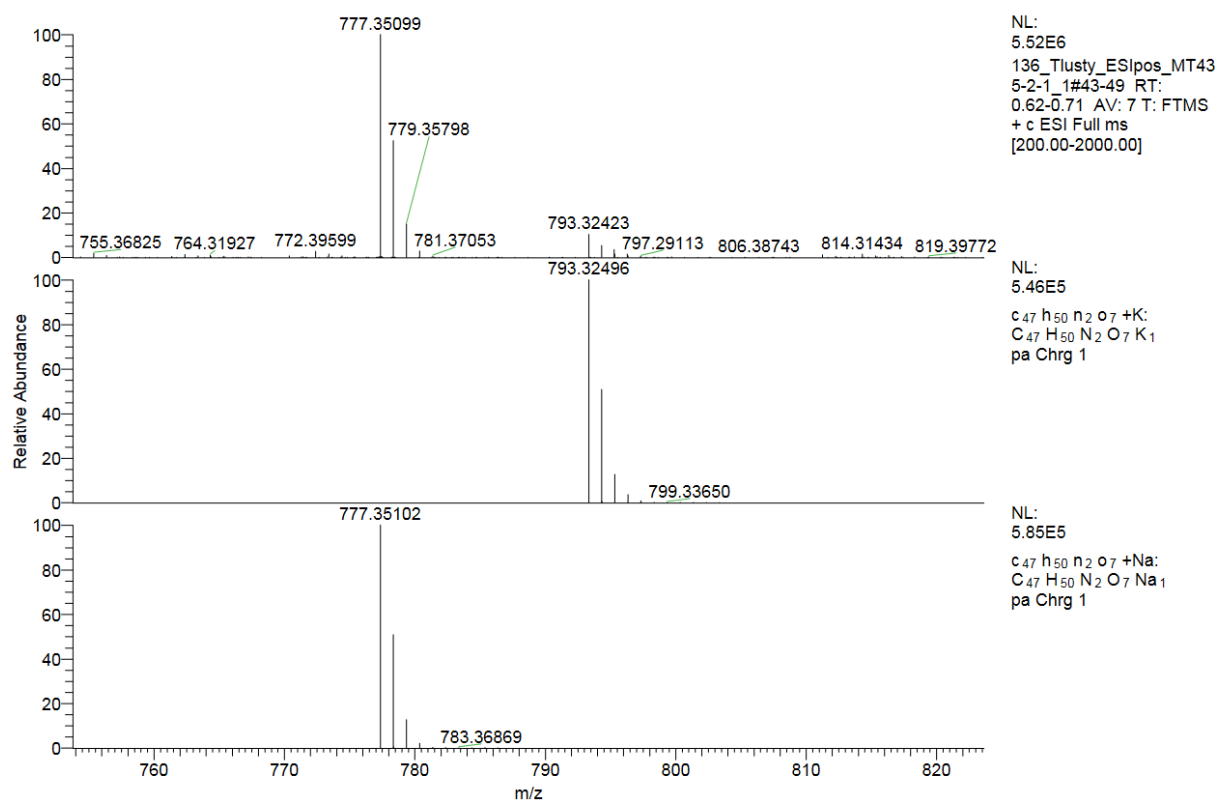

**Figure S11:** HRMS of compound **7c** (ESI<sup>+</sup>).

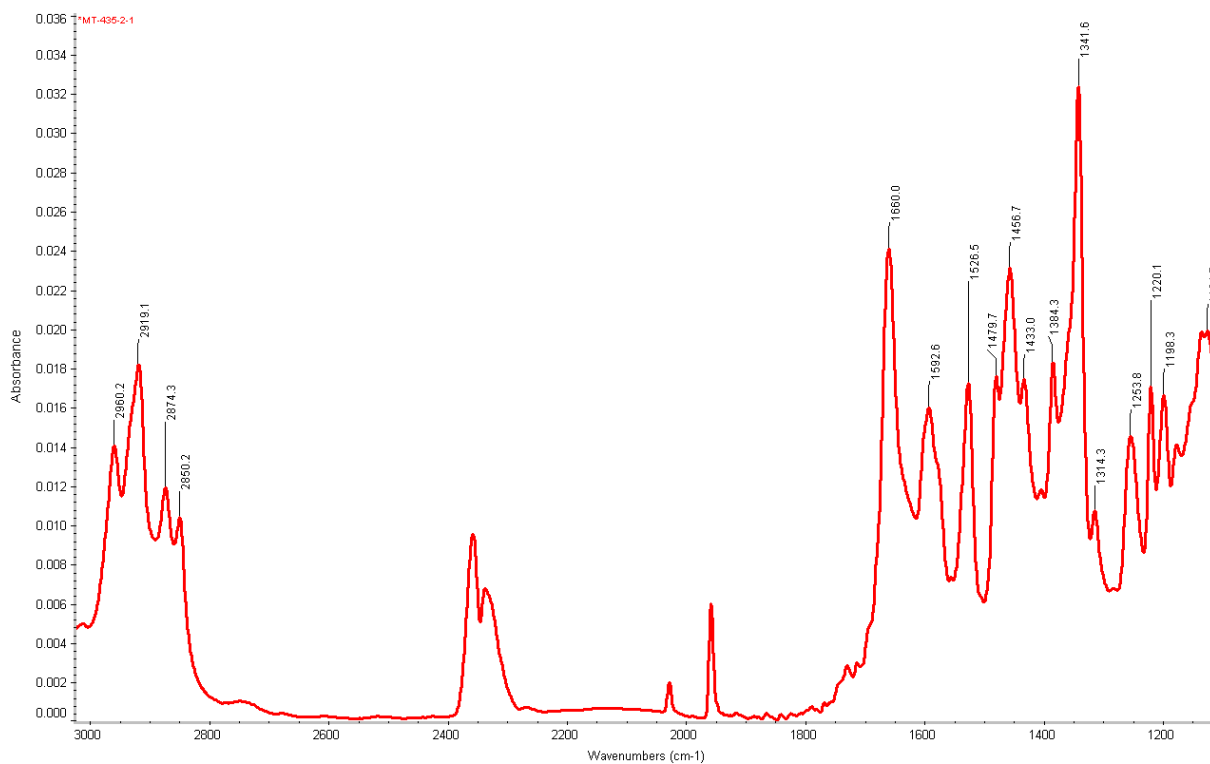

**Figure S12:** IR of compound **7c** (KBr).

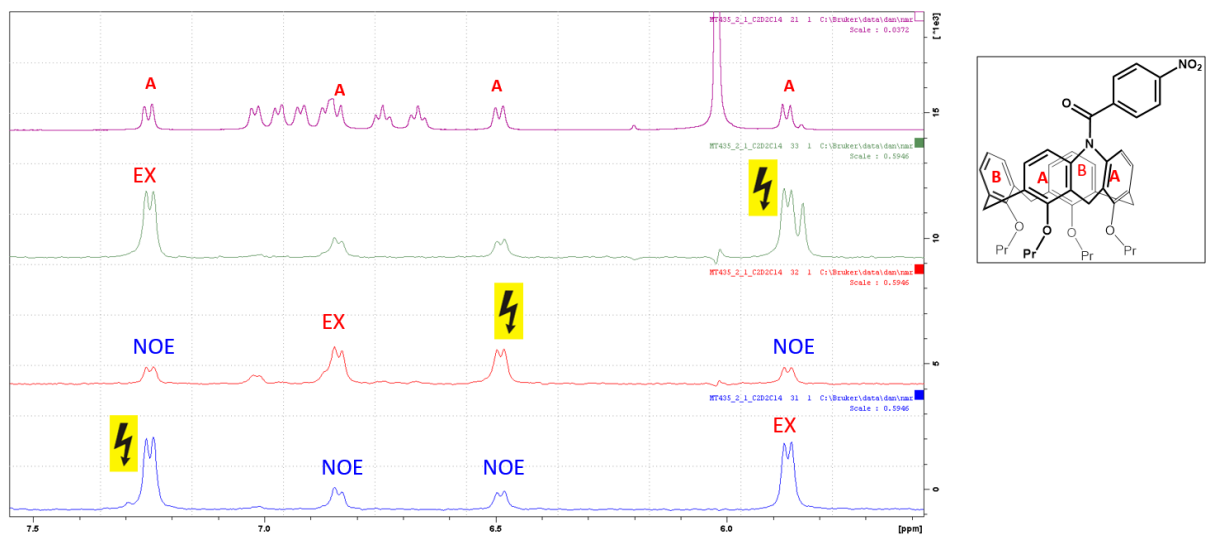

**Figure S13:**  $^1\text{H}$  NMR NOE of compound **7c** ( $\text{C}_2\text{D}_2\text{Cl}_4$ , 253 K, 500 MHz).

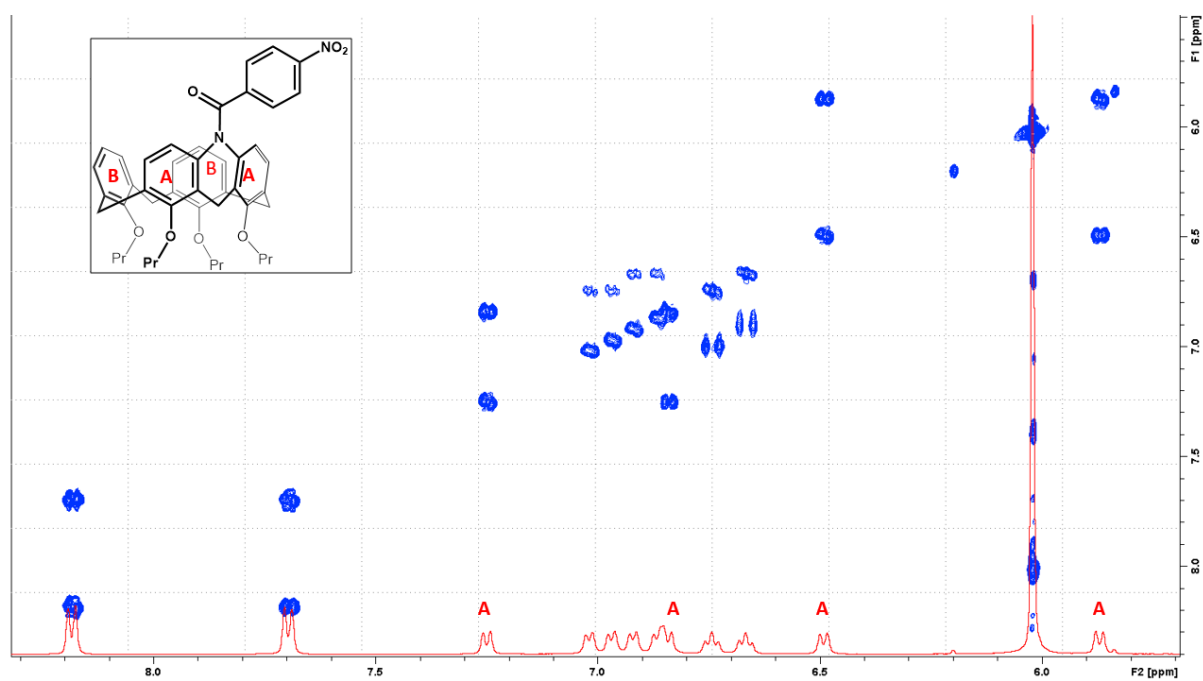

**Figure S14:**  $^1\text{H}$  NMR COSY of compound **7c** ( $\text{C}_2\text{D}_2\text{Cl}_4$ , 253 K, 500 MHz).



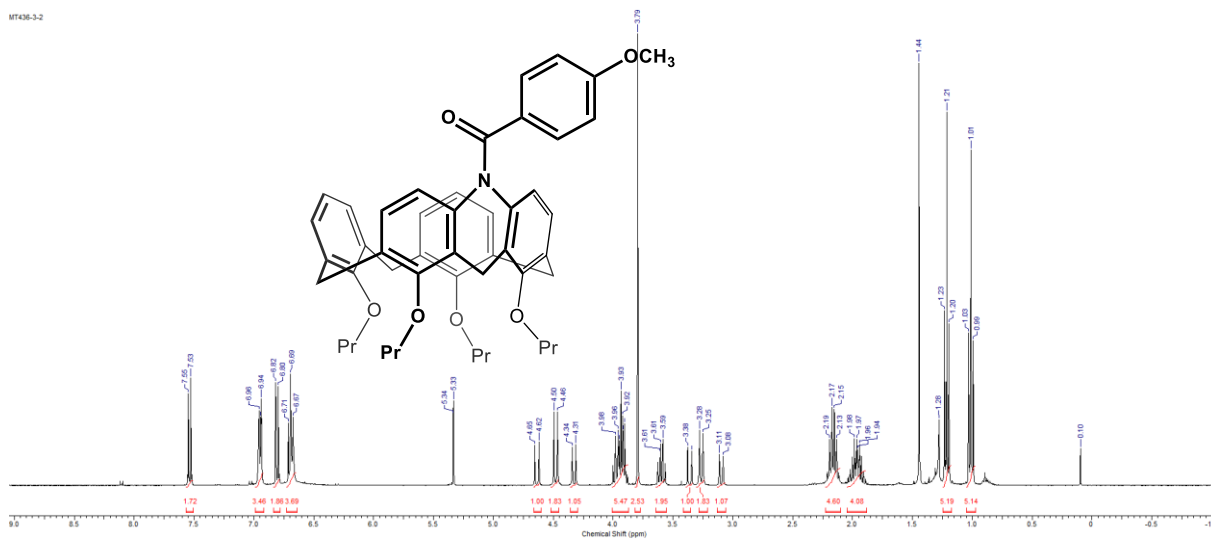

**Figure S15:**  $^1\text{H}$  NMR of compound **7d** ( $\text{CDCl}_3$ , 400 MHz).

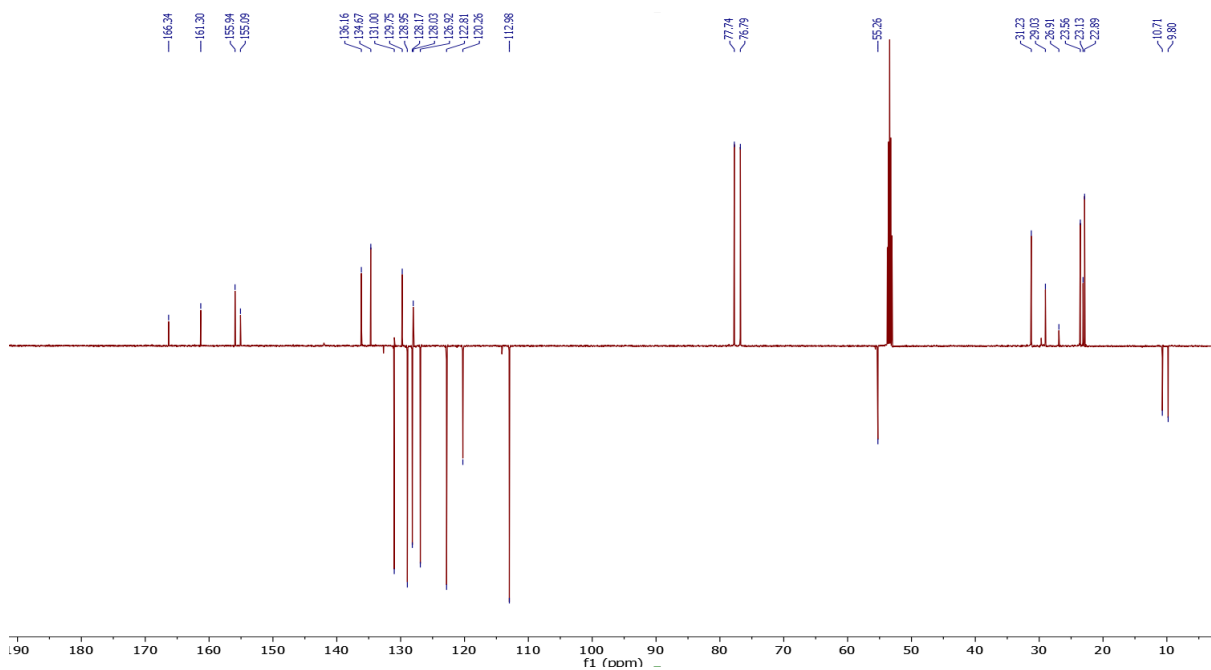

**Figure S16:**  $^{13}\text{C}$ (APT) NMR of compound **7d** ( $\text{CDCl}_3$ , 100 MHz).

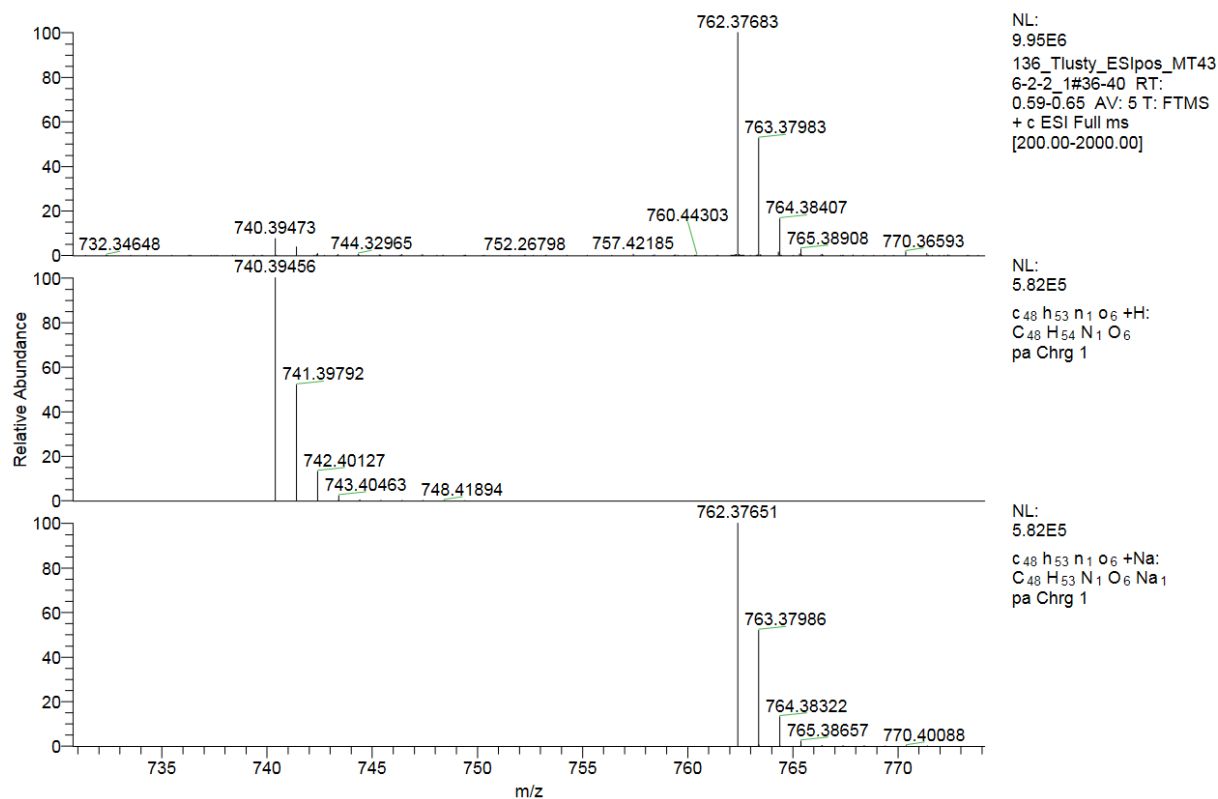

**Figure S17:** HRMS of compound **7d** (ESI<sup>+</sup>).

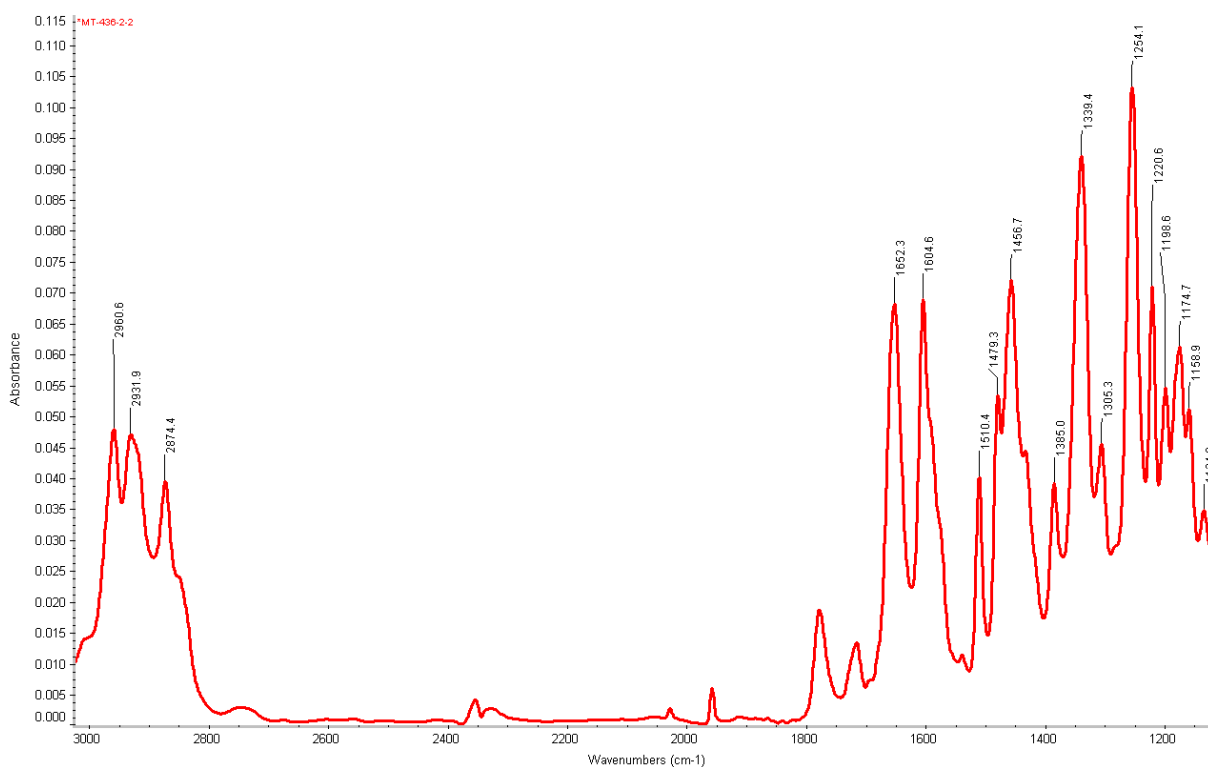

**Figure S18:** IR of compound **7d** (KBr).

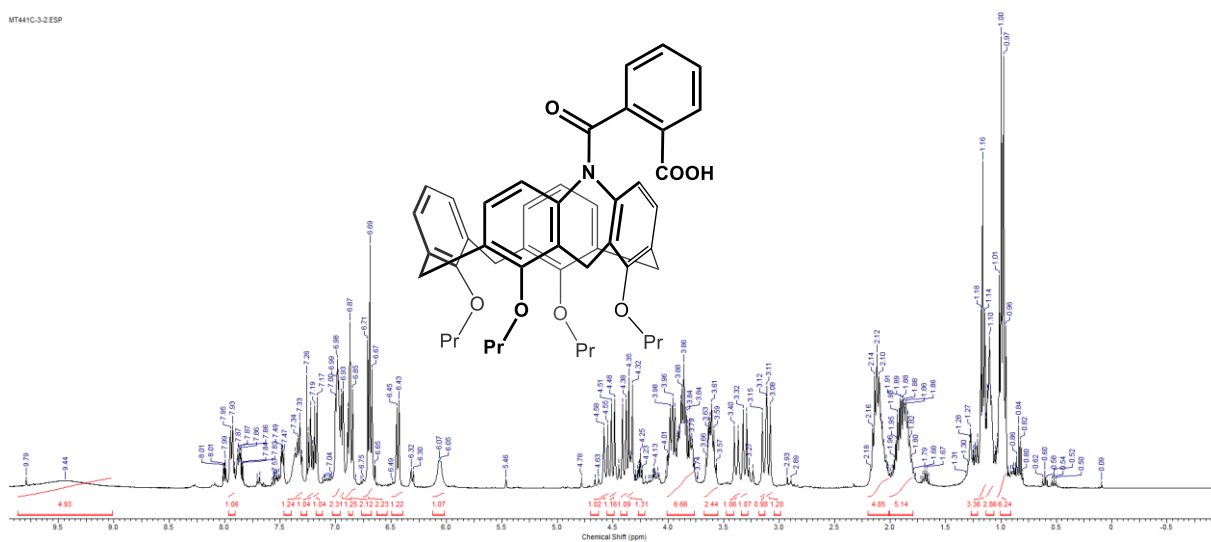

Figure S19: <sup>1</sup>H NMR of compound 7e (CDCl<sub>3</sub>, 400 MHz).

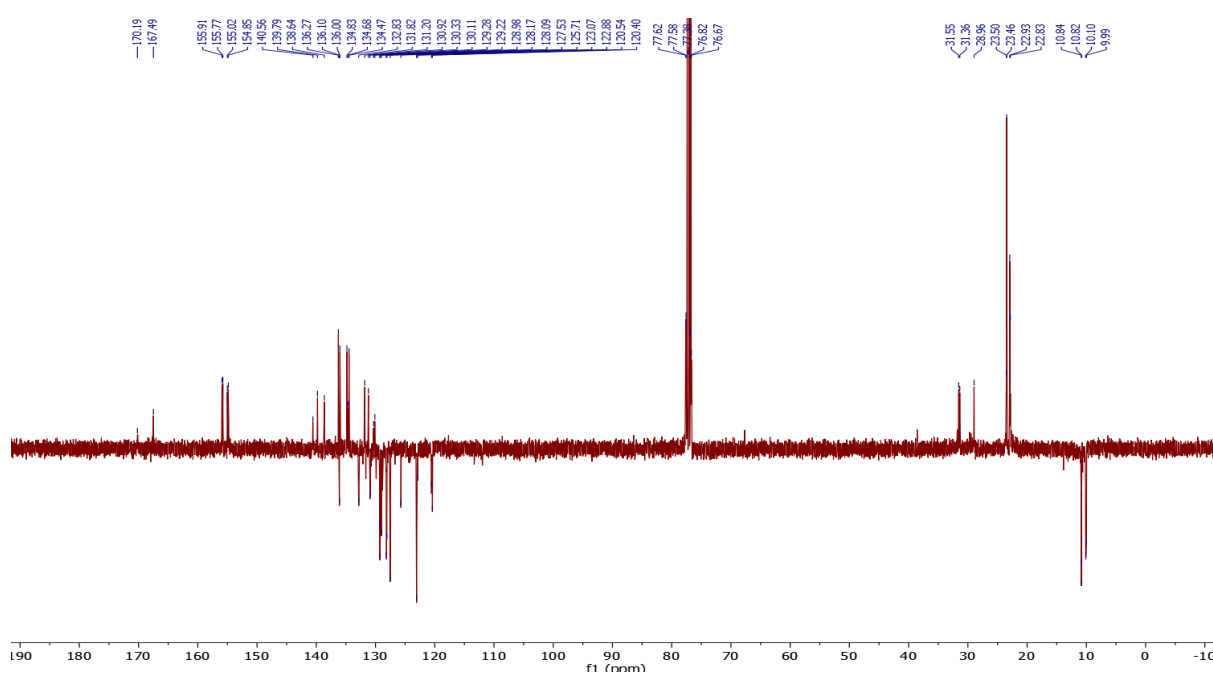

Figure S20: <sup>13</sup>C (APT) NMR of compound 7e (CDCl<sub>3</sub>, 100 MHz).

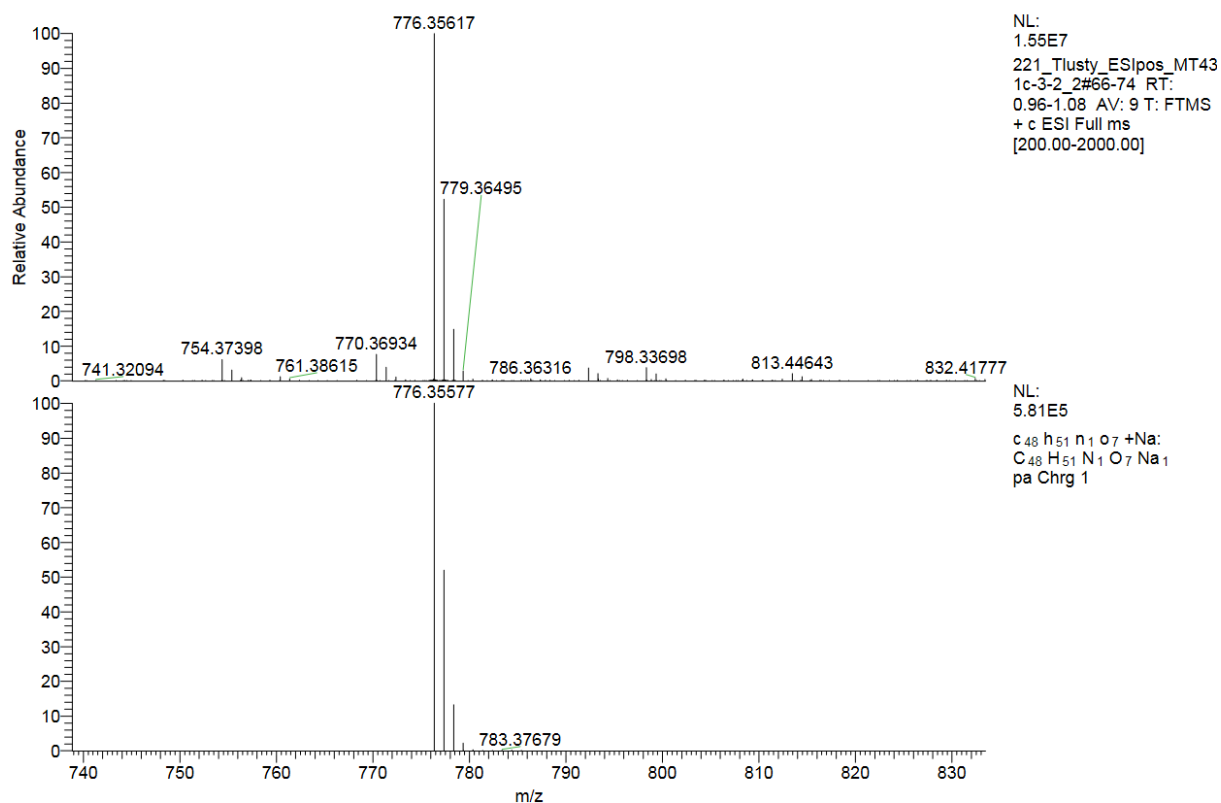

Figure S21: HRMS of compound 7e (ESI<sup>+</sup>).

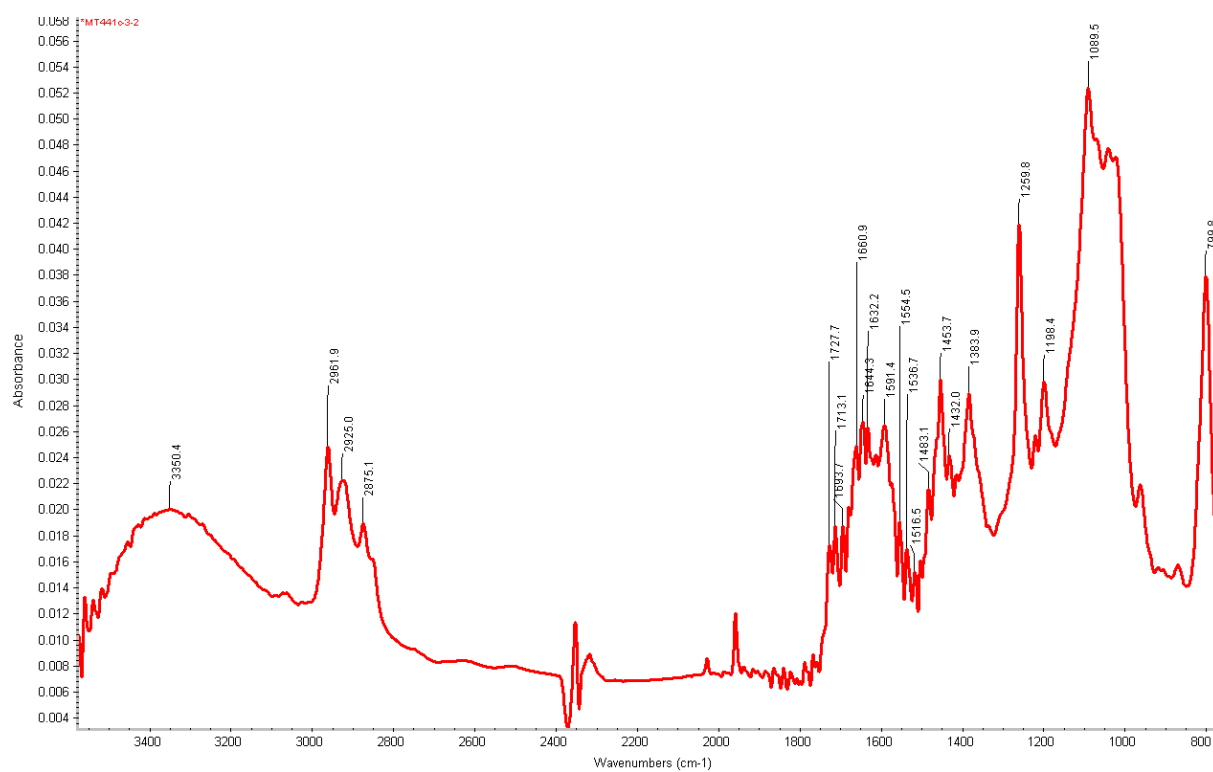

Figure S22: IR of compound 7e (KBr).

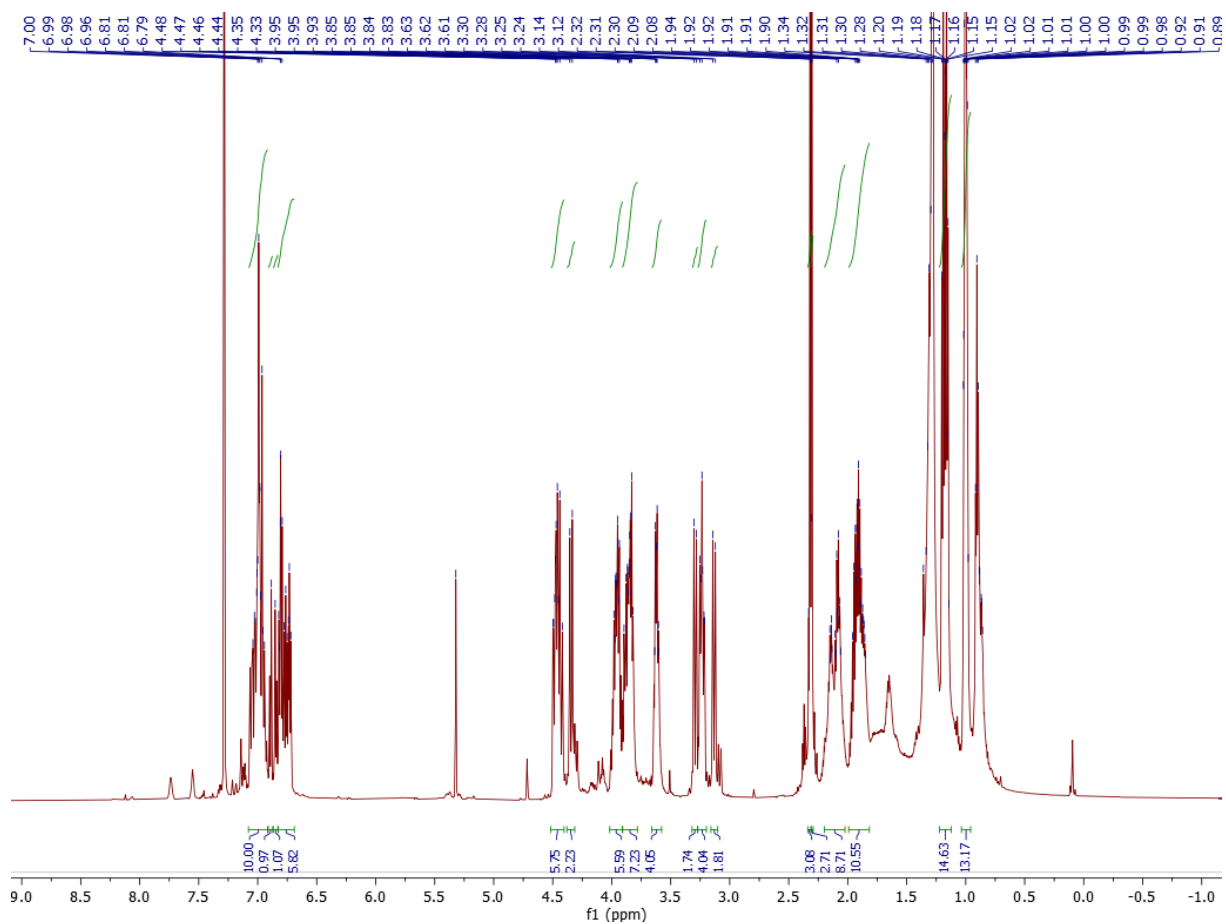

Figure S23:  $^1\text{H}$  NMR of mixture of compounds **8a** and **8b** ( $\text{CDCl}_3$ , 500 MHz).

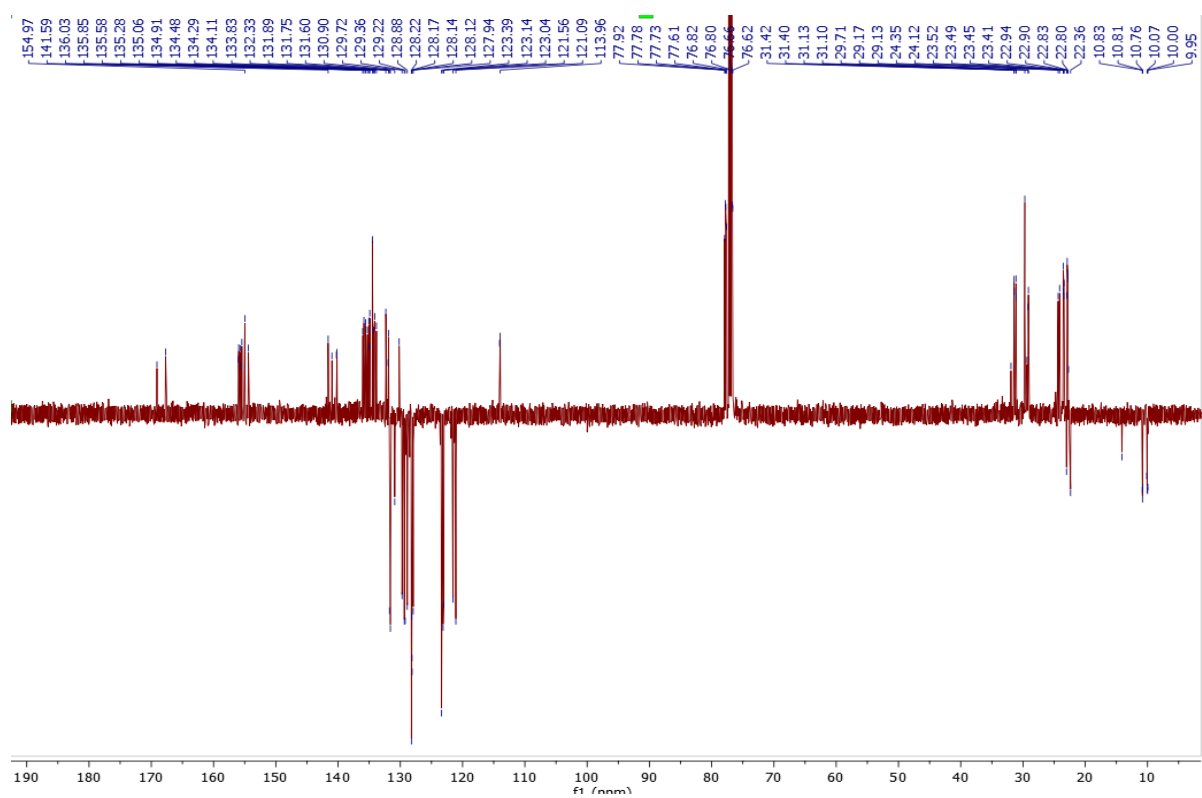

Figure S24:  $^{13}\text{C}$ (APT) NMR of mixture of compounds **8a** and **8b** ( $\text{CDCl}_3$ , 125 MHz).

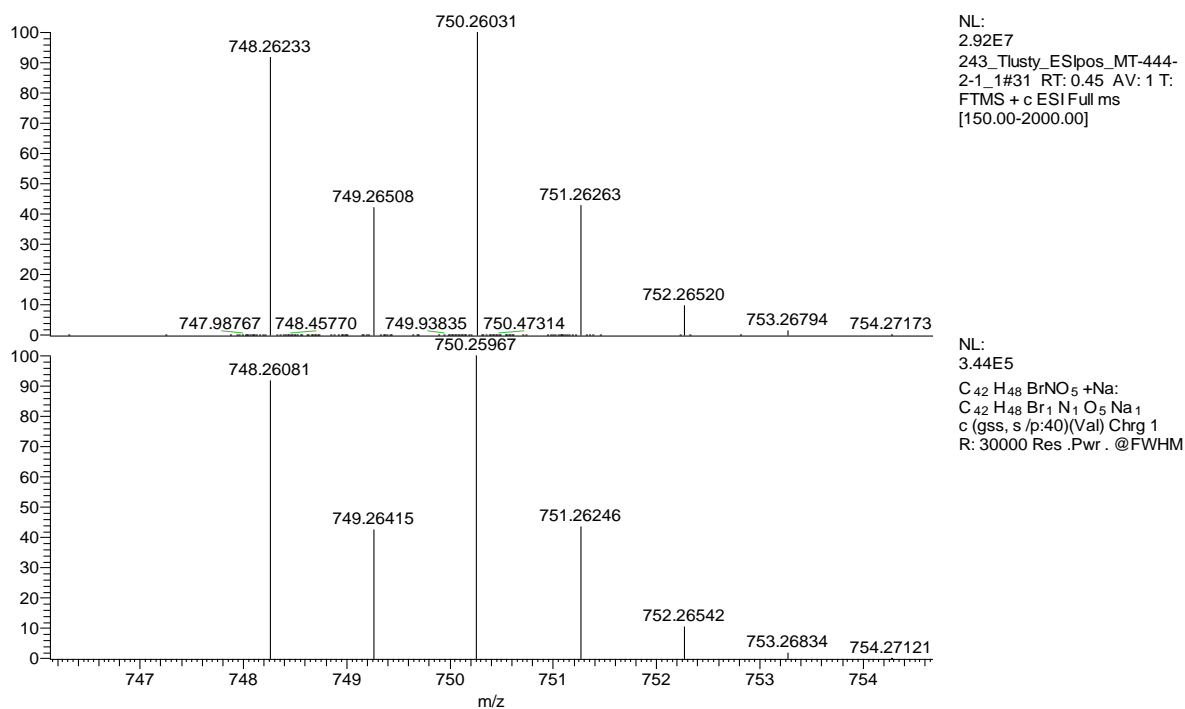

**Figure S25:** HRMS of mixture of compounds **8a** and **8b** (ESI<sup>+</sup>).

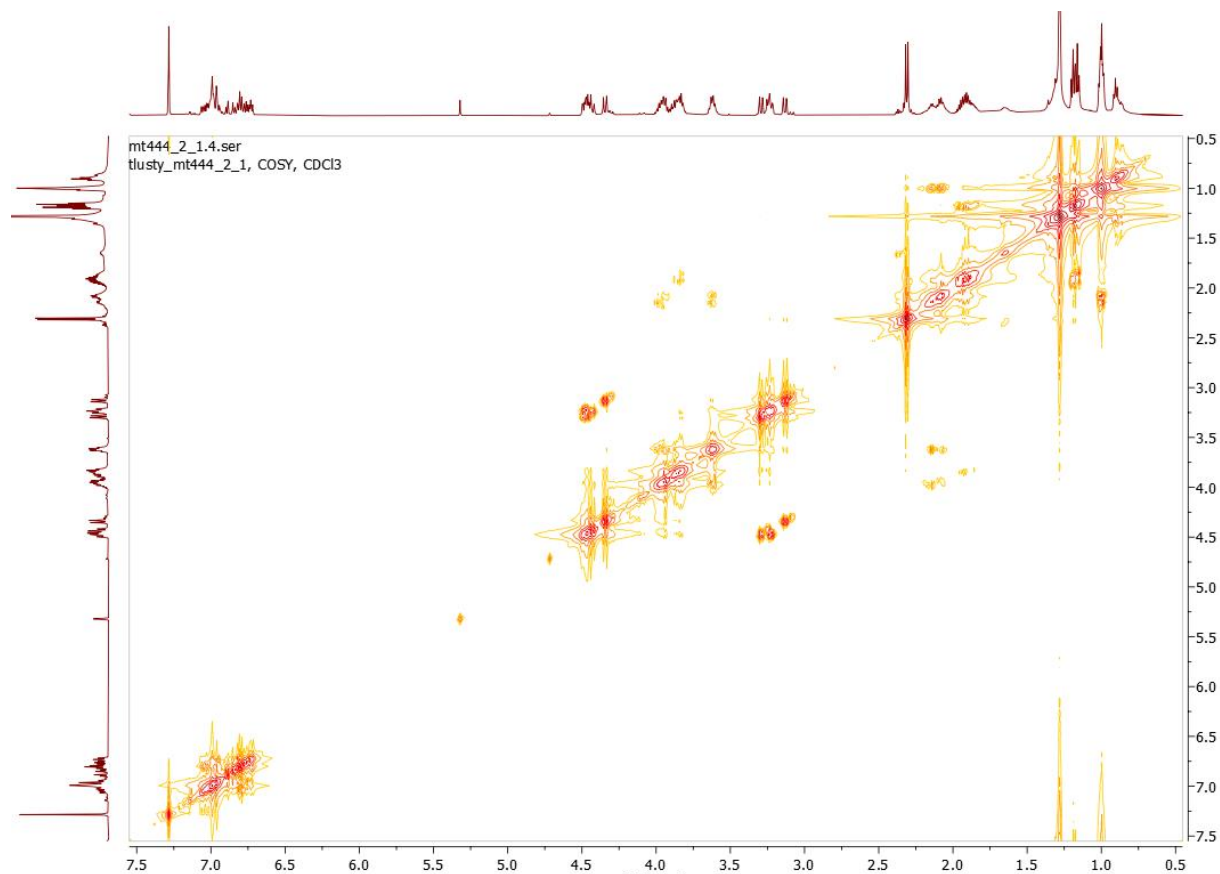

**Figure S26:** <sup>1</sup>H-<sup>1</sup>H COSY of mixture of compounds **8a** and **8b** (CDCl<sub>3</sub>, 500 MHz).

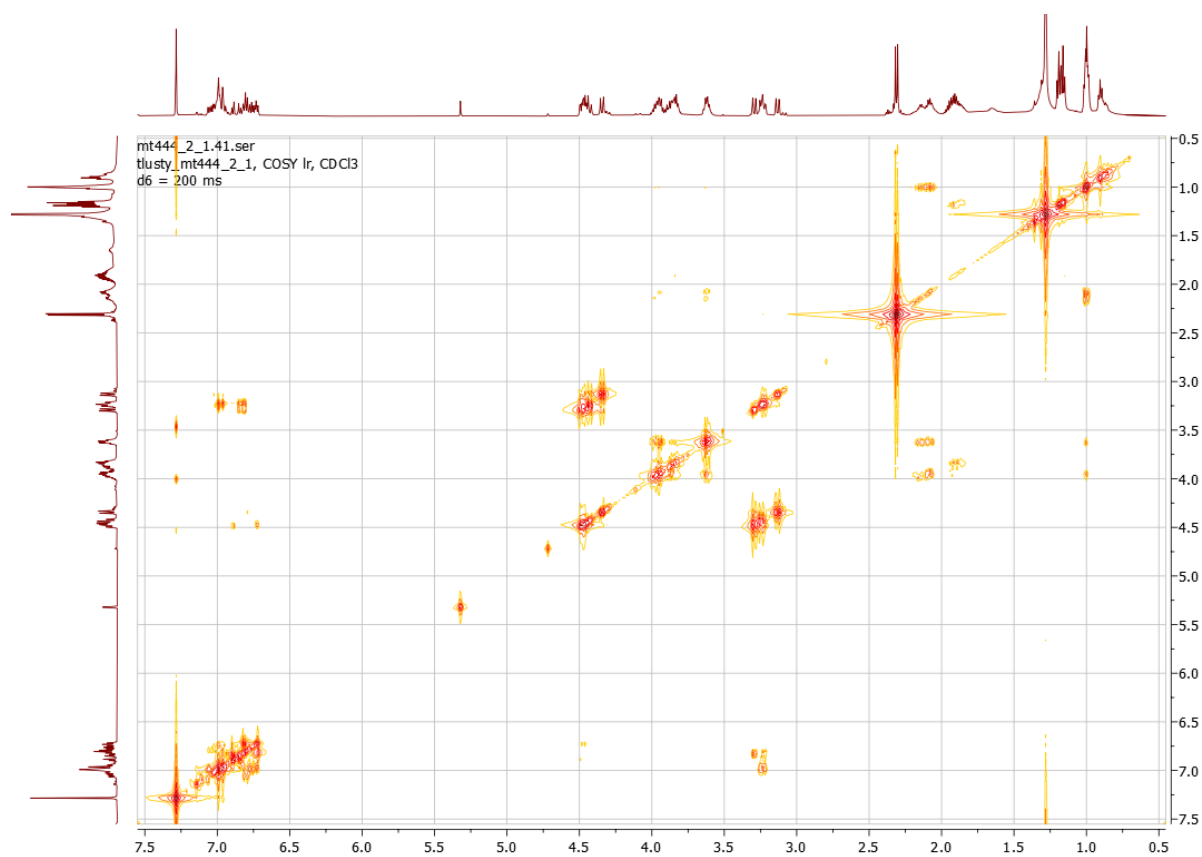

**Figure S27:**  $^1\text{H}$ - $^1\text{H}$  COSY ( $d_6 = 200$  ms) of mixture of compounds **8a** and **8b** ( $\text{CDCl}_3$ , 500 MHz).

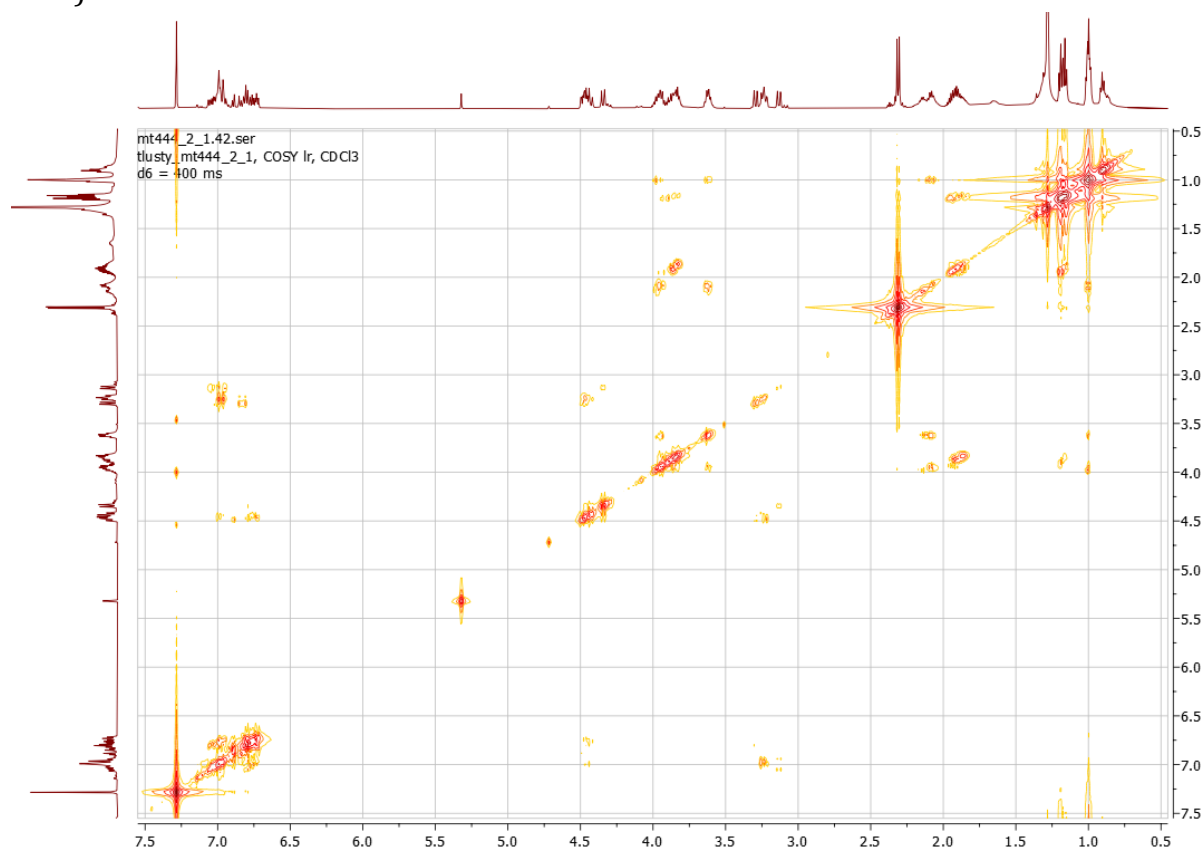

**Figure S28:**  $^1\text{H}$ - $^1\text{H}$  COSY ( $d_6 = 400$  ms) of mixture of compounds **8a** and **8b** ( $\text{CDCl}_3$ , 500 MHz).

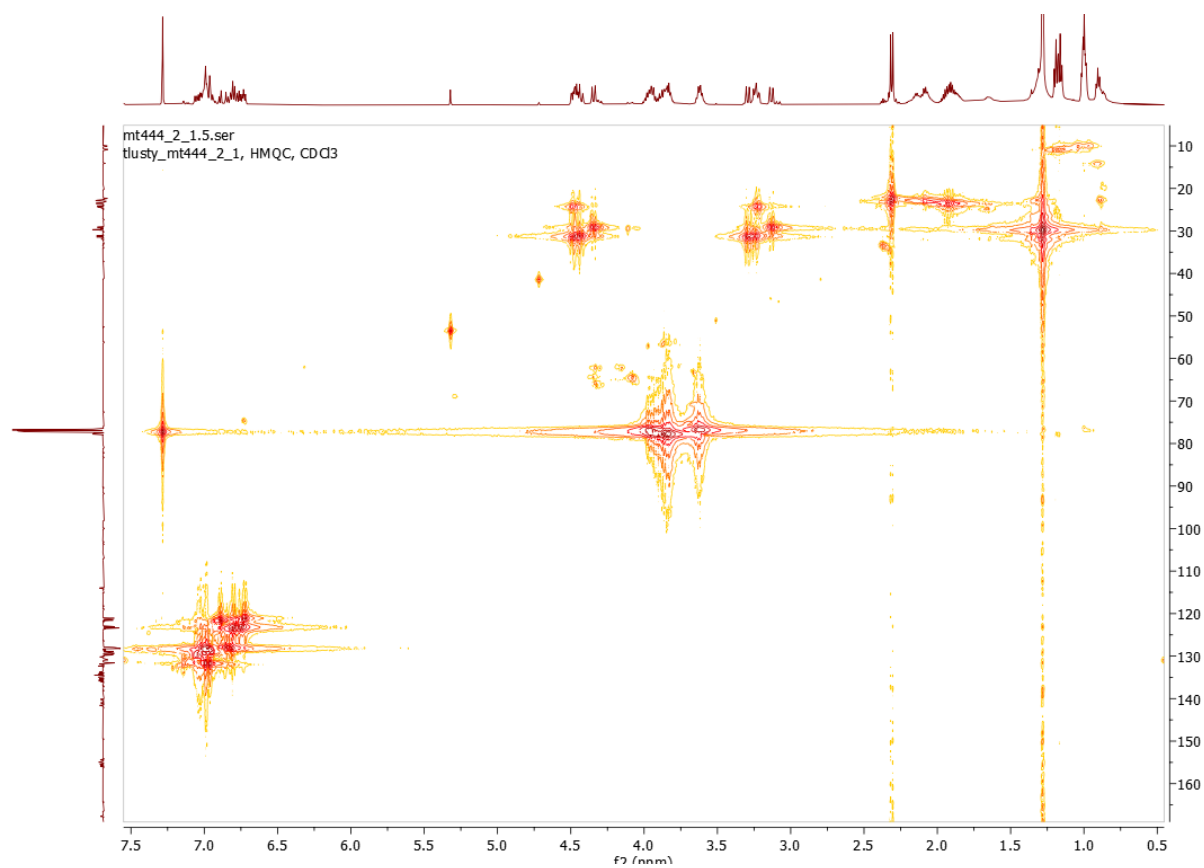

**Figure S29:** HMQC of mixture of compounds **8a** and **8b** (CDCl<sub>3</sub>, 500, 125 MHz).

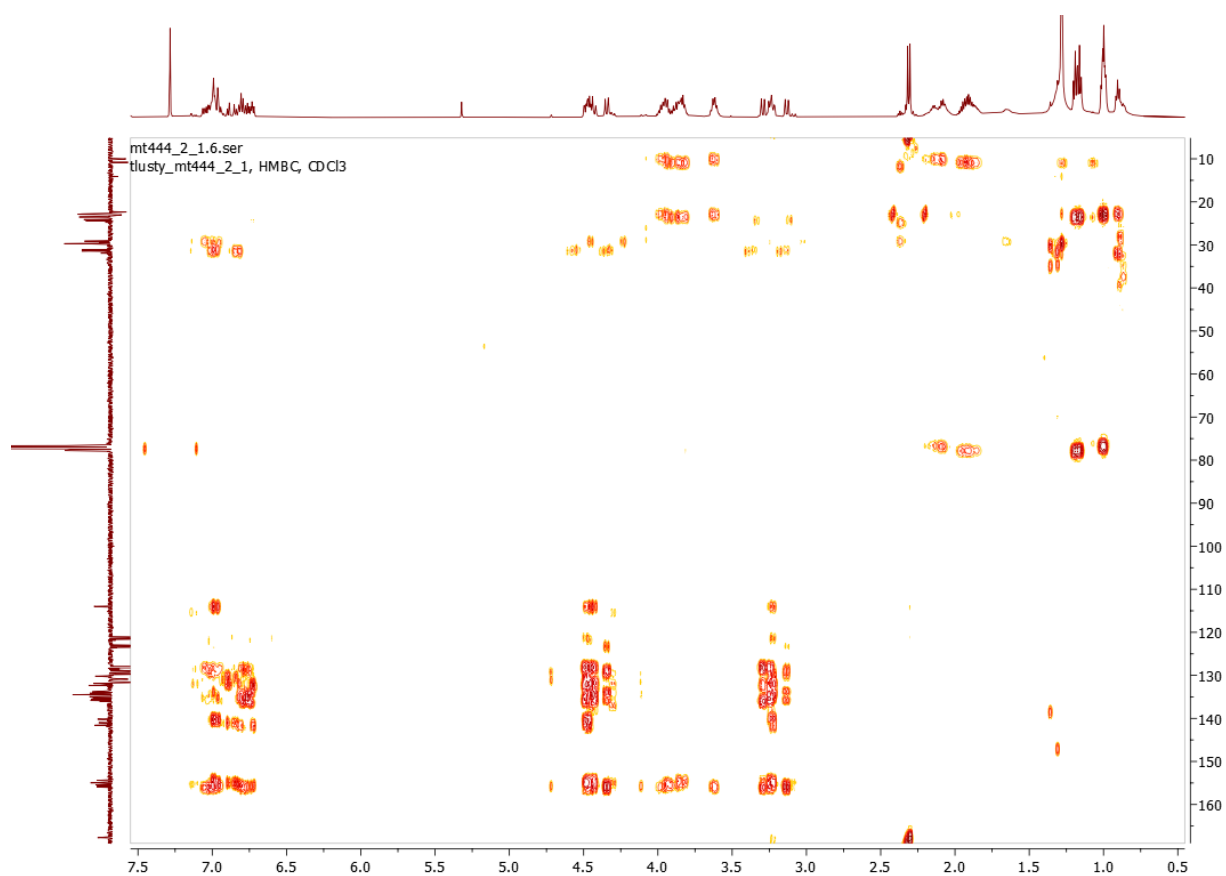

**Figure S30:** HMBC of mixture of compounds **8a** and **8b** (CDCl<sub>3</sub>, 500, 125 MHz).



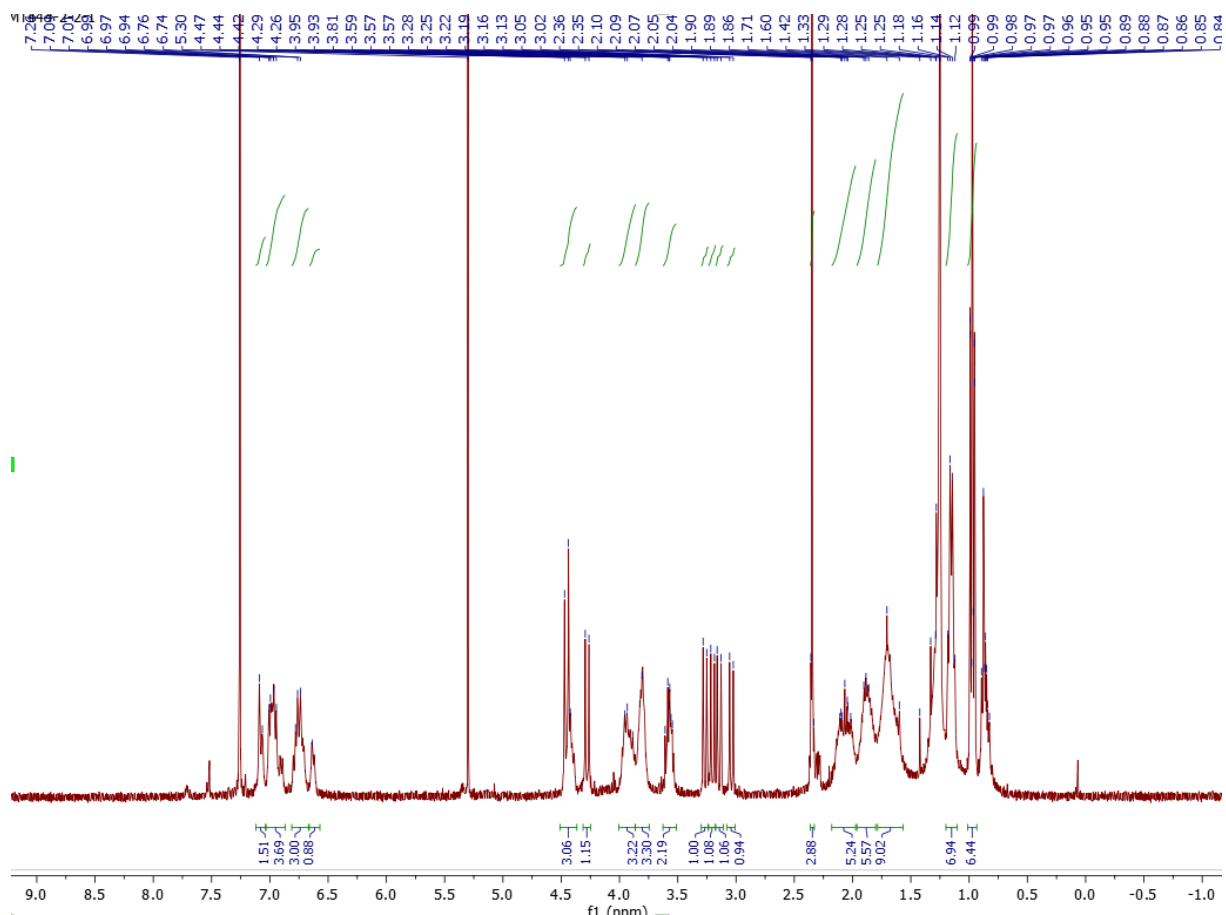

**Figure S31:**  $^1\text{H}$  NMR of mixture of compounds **8c** ( $\text{CDCl}_3$ , 500 MHz).

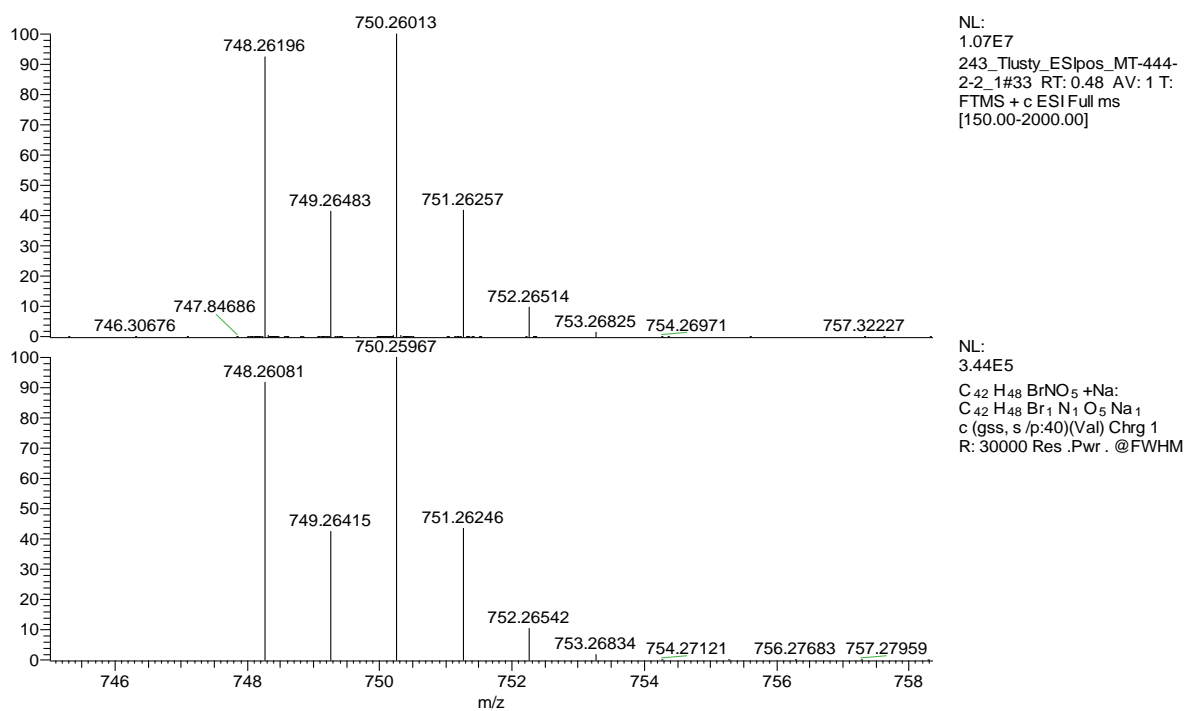

**Figure S32:** HRMS of compound **8c** (ESI<sup>+</sup>).

## 2. Dynamic NMR measurements

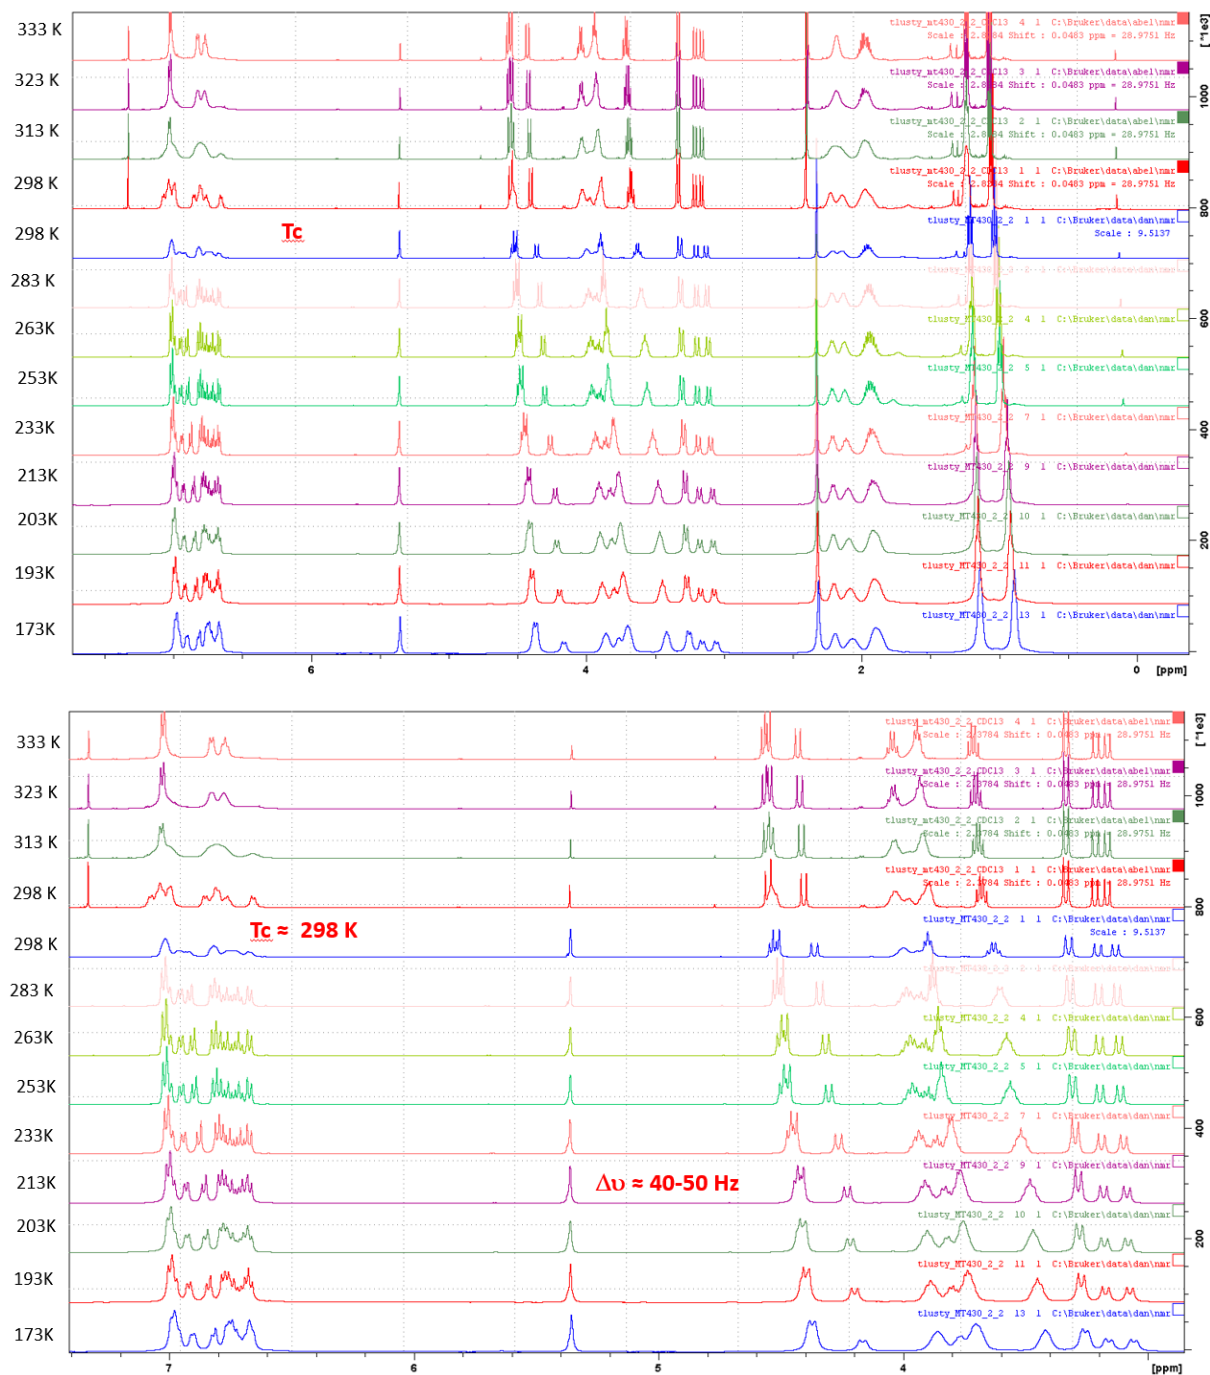

**Figure S33:** Temperature-dependent <sup>1</sup>H NMR spectra of **7a** (333 – 298 K: CDCl<sub>3</sub>, 298 – 173 K: CD<sub>2</sub>Cl<sub>2</sub>, 500 MHz)

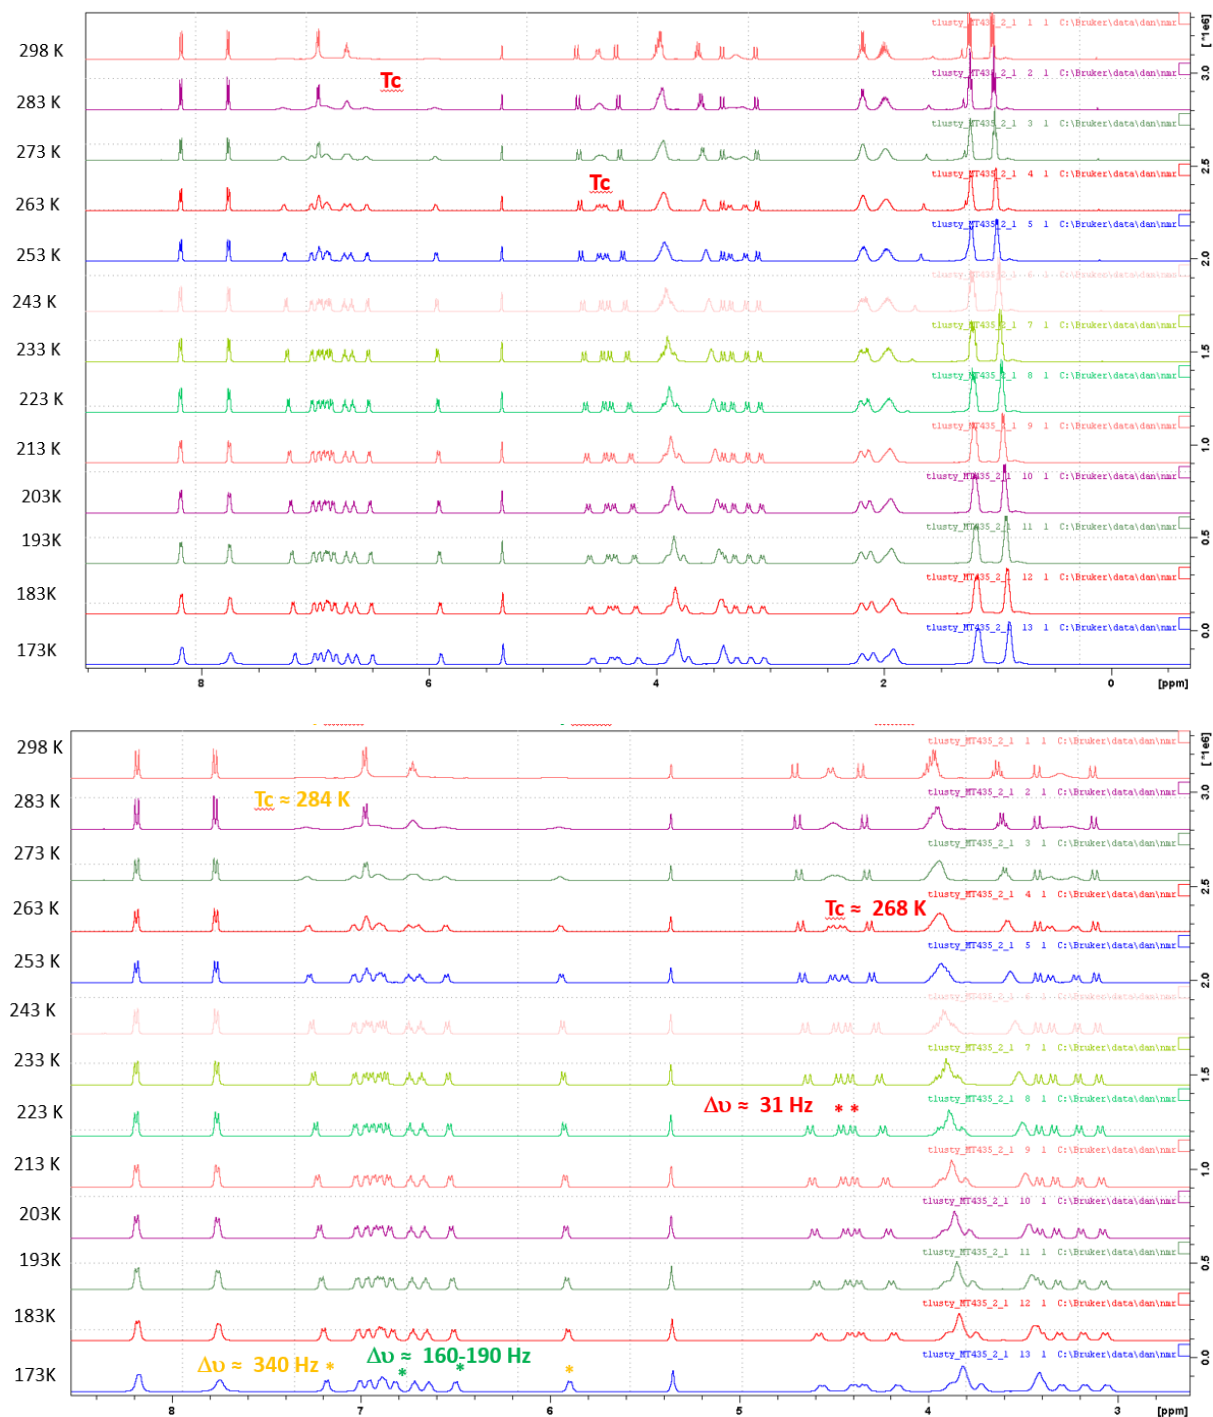

**Figure S34:** Temperature-dependent  $^1\text{H}$  NMR spectra of **7c** (298 – 173 K;  $\text{CD}_2\text{Cl}_2$ , 500 MHz)

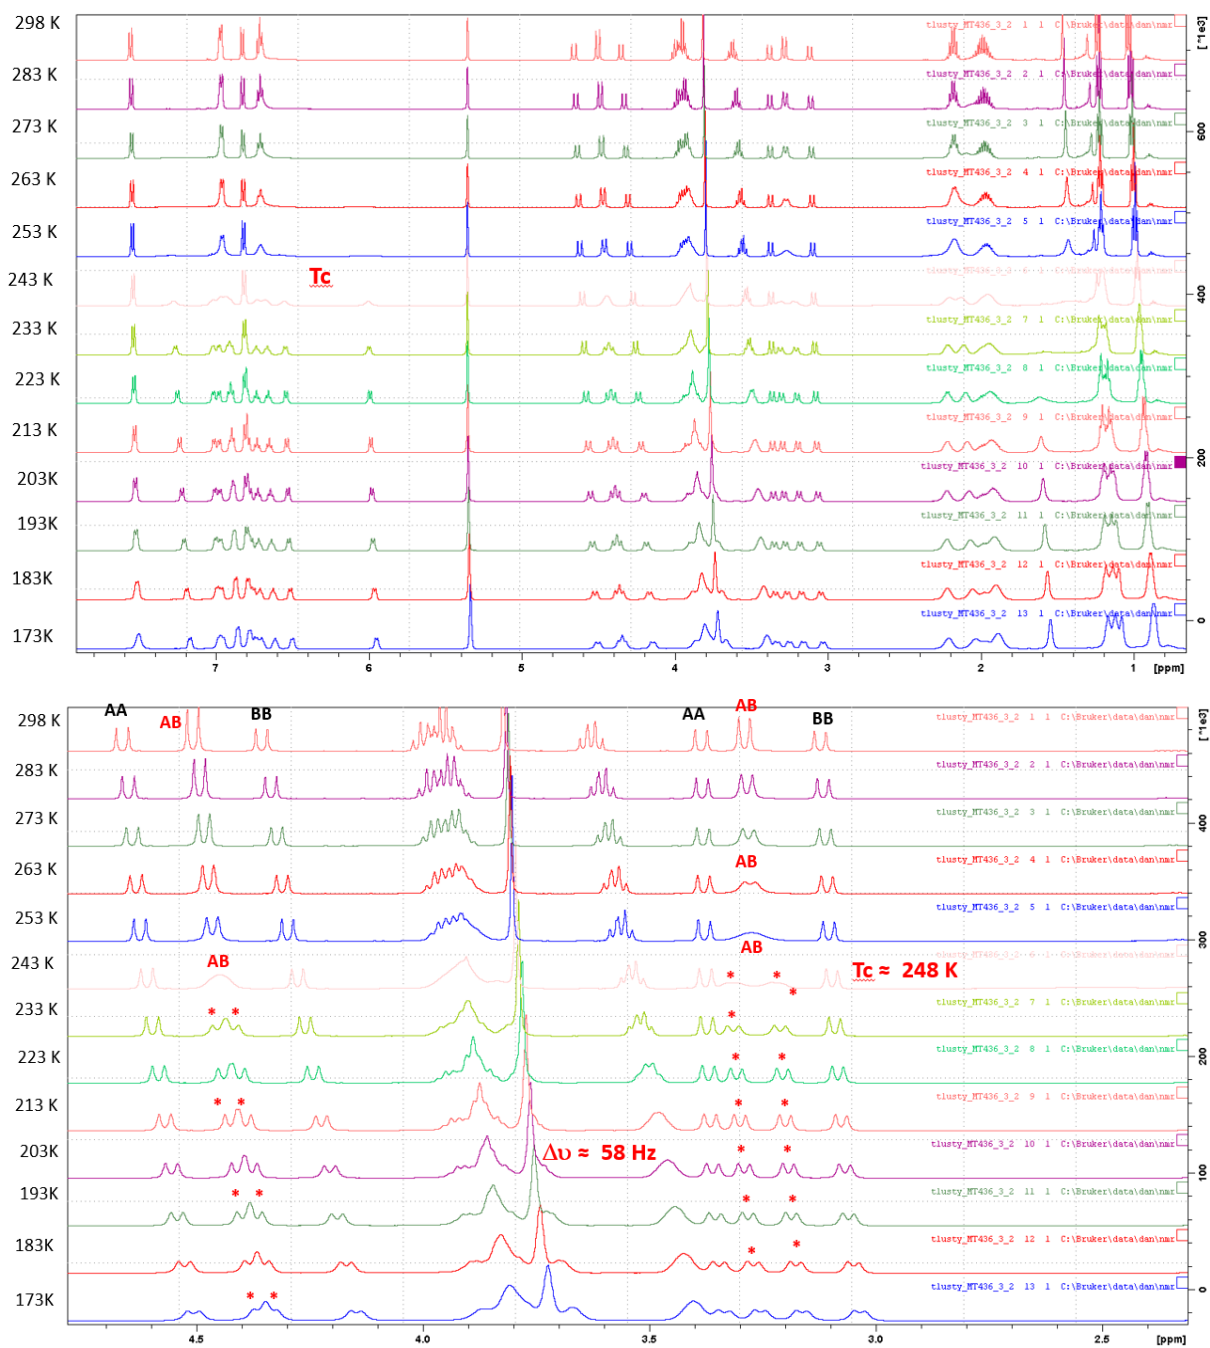

**Figure S35:** Temperature-dependent  $^1\text{H}$  NMR spectra of **7d** (298 – 173 K:  $\text{CD}_2\text{Cl}_2$ , 500 MHz)

**8a/8b** (500 MHz, CDCl<sub>2</sub>-CDCl<sub>2</sub>)

$\Delta G \approx 76$  kJ/mol

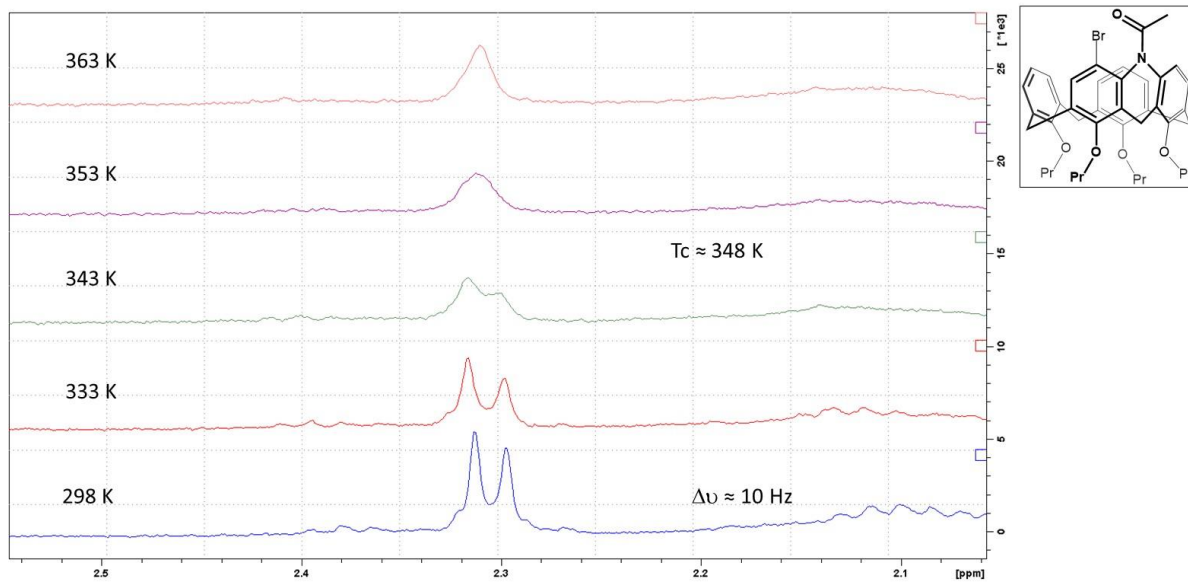

**Figure S36:** Temperature-dependent <sup>1</sup>H NMR spectra of **8a/8b** (298 – 363 K: CDCl<sub>2</sub>-CDCl<sub>2</sub>, 500 MHz)

### 3. Crystallographic data

Crystallographic data for **7c**

$M = 754.92 \text{ g.mol}^{-1}$ , monoclinic system, space group  $P2_1/c$ ,  $a = 9.46594 (8) \text{ \AA}$ ,  $b = 17.66158 (14) \text{ \AA}$ ,  $c = 23.8239 (2) \text{ \AA}$ ,  $\beta = 90.2849 (7)^\circ$ ,  $Z = 4$ ,  $V = 3982.91 (6) \text{ \AA}^3$ ,  $D_c = 1.259 \text{ g.cm}^{-3}$ ,  $\mu(\text{Cu-K}\alpha) = 0.68 \text{ mm}^{-1}$ , crystal dimensions of  $0.49 \times 0.16 \times 0.09 \text{ mm}$ . Data were collected at  $130 (2) \text{ K}$  on a Rigaku OD Gemini AtlasS2 CCD diffractometer with mirror collimated sealed X-ray tube Cu-K $\alpha$  radiation. The structure was solved by charge flipping methods<sup>1</sup> and anisotropically refined by full matrix least squares on  $F^2$  using the CRYSTALS suite of programs<sup>2</sup> to final value  $R = 0.037$  and  $wR = 0.095$  using 7139 independent reflections ( $\theta_{\text{max}} = 67.7^\circ$ ), 563 parameters and 58 restraints. The hydrogen atoms bonded to carbon atoms were placed in calculated positions refined with a riding constraints. The disordered functional groups positions were found in difference electron density maps and refined with restrained geometry. MCE<sup>3</sup> was used for visualization of electron density maps. The occupancy of disordered functional group was constrained to full. The structure was deposited into Cambridge Structural Database under number CCDC 2157472.

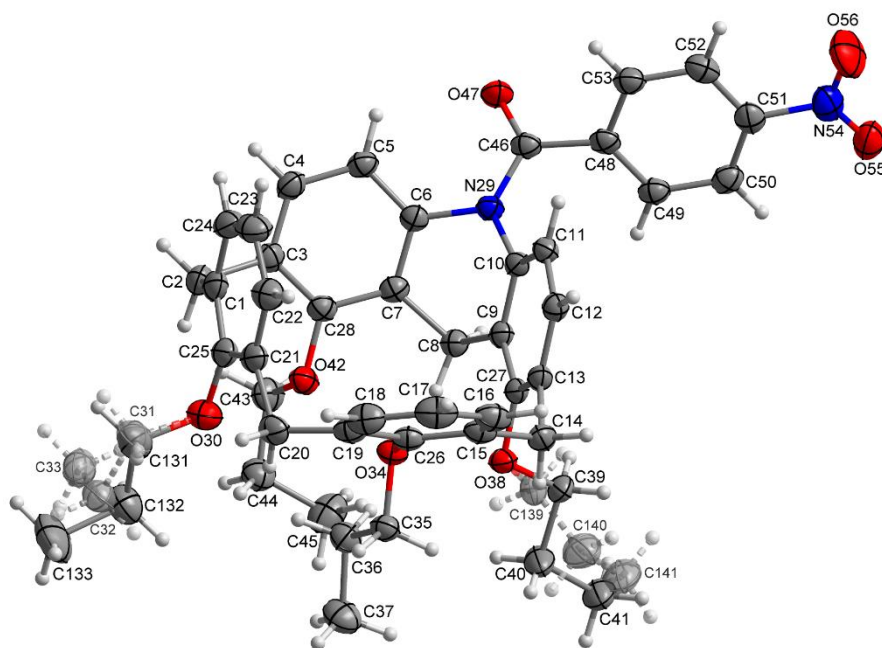

**Figure S37:** The asymmetric unit of crystal structure **7c**, the ADPs drawn at 50% probability level. The weakly occupied atoms depicted as transparent.

- [1] Palatinus, L., Chapuis, G. (2007). *J. Appl. Cryst.* 40, 786-790.
- [2] Betteridge, P.W., Carruthers, J.R., Cooper, R.I., Prout, K. & Watkin, D.J. (2003). *J. Appl. Cryst.* 36, 1487.
- [3] Rohlicek J., Husak M.: *J. Appl. Cryst.* 40, 600 (2007)

## 4. Titration experiments

Calixarene **7c** was dissolved in a specified amount of  $C_2D_2Cl_4$ . 0.5 ml of calixarene solution was put in an NMR tube. To the calixarene solution (0.6 ml), a specific amount of *N*-methylisoquinolinium iodide (NMII) was added. The aliquots of NMII were gradually added to the NMR tube to achieve different calixarene/guest ratios (1:0.000-50.012), ensuring constant host concentration during the experiment. The complexation constant was determined by analyzing CIS of host protons using nonlinear curve-fitting procedure (program BindFit).

|                        |                 |                        |               |
|------------------------|-----------------|------------------------|---------------|
| M(NMII)                | 271,10147 g/mol | M(calix)               | 754,924 g/mol |
| m(NMII)                | 0,00859 g       | m(calix)               | 0,00200 g     |
| c(NMII)                | 0,05281 mol/l   | c(calix)               | 0,00053 mol/l |
| V( $C_2D_2Cl_4$ _NMII) | 0,6 ml          | V( $C_2D_2Cl_4$ _cali) | 5 ml          |

|    | V (total) [ml] | V(addition, total) [ml] | V(addition) [ml] | c(NMII) [mol/l] | c(calix) [mol/l] | c(calix)/c(NMII) | shift [Hz] |
|----|----------------|-------------------------|------------------|-----------------|------------------|------------------|------------|
| 1  | 0,5000         | 0,0000                  | 0,0000           | 0,00000         | 0,00053          | 0,00000          | 3276,67    |
| 2  | 0,5006         | 0,0006                  | 0,0006           | 0,00006         | 0,00053          | 0,11946          | 3276,87    |
| 3  | 0,5012         | 0,0012                  | 0,0006           | 0,00013         | 0,00053          | 0,23863          | 3276,67    |
| 4  | 0,5020         | 0,0020                  | 0,0008           | 0,00021         | 0,00053          | 0,39708          | 3276,97    |
| 5  | 0,5028         | 0,0028                  | 0,0008           | 0,00029         | 0,00053          | 0,55503          | 3276,77    |
| 6  | 0,5042         | 0,0042                  | 0,0014           | 0,00044         | 0,00053          | 0,83023          | 3277,07    |
| 7  | 0,5056         | 0,0056                  | 0,0014           | 0,00058         | 0,00053          | 1,10391          | 3277,16    |
| 8  | 0,5136         | 0,0136                  | 0,0080           | 0,00140         | 0,00053          | 2,63917          | 3276,77    |
| 9  | 0,5236         | 0,0236                  | 0,0100           | 0,00238         | 0,00053          | 4,49227          | 3275,89    |
| 10 | 0,5536         | 0,0536                  | 0,0300           | 0,00511         | 0,00053          | 9,64988          | 3275,31    |
| 11 | 0,5936         | 0,0936                  | 0,0400           | 0,00833         | 0,00053          | 15,71575         | 3274,33    |
| 12 | 0,6436         | 0,1436                  | 0,0500           | 0,01178         | 0,00053          | 22,23779         | 3274,33    |
| 13 | 0,7136         | 0,2136                  | 0,0700           | 0,01581         | 0,00053          | 29,83319         | 3273,45    |
| 14 | 0,8036         | 0,3036                  | 0,0900           | 0,01995         | 0,00053          | 37,65435         | 3273,06    |
| 15 | 0,9036         | 0,4036                  | 0,1000           | 0,02359         | 0,00053          | 44,51724         | 3271,88    |
| 16 | 1,0036         | 0,5036                  | 0,1000           | 0,02650         | 0,00053          | 50,01248         | 3271,10    |

K                    3,86  $M^{-1}$   
 Error                0,34844606  $M^{-1}$

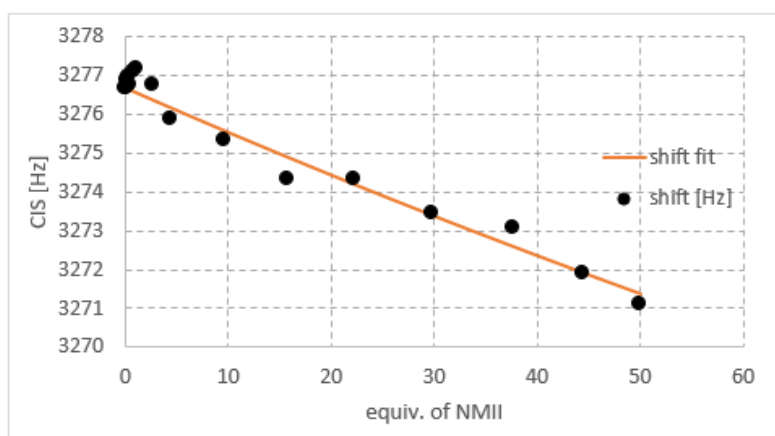

**Figure S38:**  $^1H$  NMR titration of compound **7c** with NMII ( $C_2D_2Cl_4$ , 400 MHz).



Calixarene **7c** was dissolved in a specified amount of C<sub>2</sub>D<sub>2</sub>Cl<sub>4</sub>. 0.5 ml of calixarene solution was put in an NMR tube. To the calixarene solution (0.6 ml), a specific amount of *N*-methylpyridinium iodide (NMPI) was added. The aliquots of NMPI were gradually added to the NMR tube to achieve different calixarene/guest ratios (1:0.000-46.843), ensuring constant host concentration during the experiment. The complexation constant was determined by analyzing CIS of host protons using nonlinear curve-fitting procedure (program BindFit).

|                 |                 |                 |               |
|-----------------|-----------------|-----------------|---------------|
| M(NMPI)         | 221,04147 g/mol | M(calix)        | 754,924 g/mol |
| m(NMPI)         | 0,00656 g       | m(calix)        | 0,00200 g     |
| c(NMPI)         | 0,04946 mol/l   | c(calix)        | 0,00053 mol/l |
| V(C2D2Cl4_NMPI) | 0,6 ml          | V(C2D2Cl4_cali) | 5 ml          |

|    | V (total) [m | V(addition, total) [n | V(addition) [ml] | c(NMPI) [mol/l] | c(calix) [mol/l] | c(calix)/c(NM | shift [Hz] |
|----|--------------|-----------------------|------------------|-----------------|------------------|---------------|------------|
| 1  | 0,5000       | 0,0000                | 0,0000           | 0,00000         | 0,00053          | 0,00000       | 3269,44    |
| 2  | 0,5006       | 0,0006                | 0,0006           | 0,00006         | 0,00053          | 0,11189       | 3269,24    |
| 3  | 0,5012       | 0,0012                | 0,0006           | 0,00012         | 0,00053          | 0,22351       | 3268,95    |
| 4  | 0,5020       | 0,0020                | 0,0008           | 0,00020         | 0,00053          | 0,37192       | 3268,46    |
| 5  | 0,5028       | 0,0028                | 0,0008           | 0,00028         | 0,00053          | 0,51986       | 3269,05    |
| 6  | 0,5042       | 0,0042                | 0,0014           | 0,00041         | 0,00053          | 0,77762       | 3270,02    |
| 7  | 0,5056       | 0,0056                | 0,0014           | 0,00055         | 0,00053          | 1,03396       | 3269,44    |
| 8  | 0,5136       | 0,0136                | 0,0080           | 0,00131         | 0,00053          | 2,47193       | 3268,85    |
| 9  | 0,5236       | 0,0236                | 0,0100           | 0,00223         | 0,00053          | 4,20760       | 3267,97    |
| 10 | 0,5536       | 0,0536                | 0,0300           | 0,00479         | 0,00053          | 9,03838       | 3267,58    |
| 11 | 0,5936       | 0,0936                | 0,0400           | 0,00780         | 0,00053          | 14,71987      | 3266,60    |
| 12 | 0,6436       | 0,1436                | 0,0500           | 0,01104         | 0,00053          | 20,82862      | 3265,43    |
| 13 | 0,7136       | 0,2136                | 0,0700           | 0,01481         | 0,00053          | 27,94271      | 3264,06    |
| 14 | 0,8036       | 0,3036                | 0,0900           | 0,01869         | 0,00053          | 35,26825      | 3262,98    |
| 15 | 0,9036       | 0,4036                | 0,1000           | 0,02209         | 0,00053          | 41,69625      | 3261,81    |
| 16 | 1,0036       | 0,5036                | 0,1000           | 0,02482         | 0,00053          | 46,84326      | 3260,63    |

K  
Error

4,62 M<sup>-1</sup>  
0,2902746 M<sup>-1</sup>

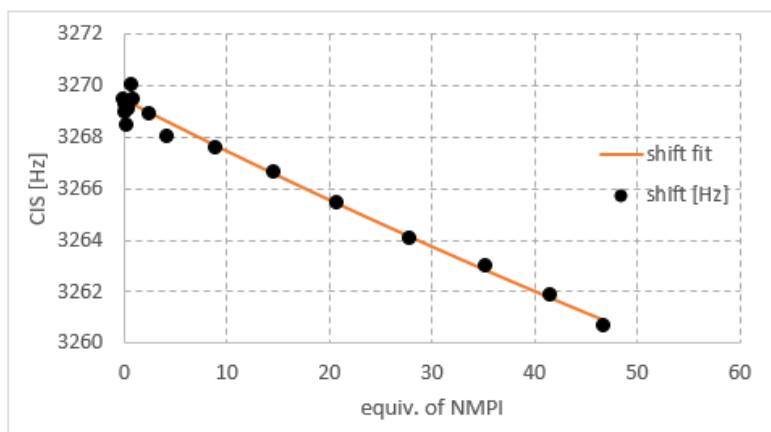

Figure S39: <sup>1</sup>H NMR titration of compound **7c** with NMPI (C<sub>2</sub>D<sub>2</sub>Cl<sub>4</sub>, 400 MHz).



Calixarene **7d** was dissolved in a specified amount of C<sub>2</sub>D<sub>2</sub>Cl<sub>4</sub>. 0.5 ml of calixarene solution was put in an NMR tube. To the calixarene solution (0.6 ml), a specific amount of *N*-methylisoquinolinium iodide (NMII) was added. The aliquots of NMII were gradually added to the NMR tube to achieve different calixarene/guest ratios (1:0.000-50.694), ensuring constant host concentration during the experiment. The complexation constant was determined by analyzing CIS of host protons using nonlinear curve-fitting procedure (program BindFit).

|                 |                 |                 |               |
|-----------------|-----------------|-----------------|---------------|
| M(NMII)         | 271,10147 g/mol | M(calix)        | 739,953 g/mol |
| m(NMII)         | 0,00818 g       | m(calix)        | 0,00221 g     |
| c(NMII)         | 0,05029 mol/l   | c(calix)        | 0,00050 mol/l |
| V(C2D2Cl4_NMII) | 0,6 ml          | V(C2D2Cl4_cali) | 6 ml          |

|    | V (total) [ml] | V(addition, total) [ml] | n V(addition) [ml] | c(NMII) [mol/l] | c(calix) [mol/l] | c(calix)/c(NMII) | shift [Hz] | shift 2 [Hz] | shift 3 [Hz] |
|----|----------------|-------------------------|--------------------|-----------------|------------------|------------------|------------|--------------|--------------|
| 1  | 0,5000         | 0,0000                  | 0,0000             | 0,00000         | 0,00050          | 0,00000          | 3269,14    | 3227,47      | 3184,14      |
| 2  | 0,5006         | 0,0006                  | 0,0006             | 0,00006         | 0,00050          | 0,12109          | 3269,14    | 3227,57      | 3184,34      |
| 3  | 0,5012         | 0,0012                  | 0,0006             | 0,00012         | 0,00050          | 0,24188          | 3269,63    | 3227,87      | 3184,53      |
| 4  | 0,5020         | 0,0020                  | 0,0008             | 0,00020         | 0,00050          | 0,40249          | 3269,05    | 3227,87      | 3184,63      |
| 5  | 0,5028         | 0,0028                  | 0,0008             | 0,00028         | 0,00050          | 0,56260          | 3269,44    | 3227,77      | 3184,44      |
| 6  | 0,5042         | 0,0042                  | 0,0014             | 0,00042         | 0,00050          | 0,84155          | 3269,34    | 3228,06      | 3184,44      |
| 7  | 0,5056         | 0,0056                  | 0,0014             | 0,00056         | 0,00050          | 1,11896          | 3269,34    | 3227,67      | 3184,24      |
| 8  | 0,5136         | 0,0136                  | 0,0080             | 0,00133         | 0,00050          | 2,67514          | 3269,34    | 3227,57      | 3184,44      |
| 9  | 0,5236         | 0,0236                  | 0,0100             | 0,00227         | 0,00050          | 4,55350          | 3269,14    | 3227,18      | 3183,65      |
| 10 | 0,5536         | 0,0536                  | 0,0300             | 0,00487         | 0,00050          | 9,78142          | 3268,46    | 3226,50      | 3182,68      |
| 11 | 0,5936         | 0,0936                  | 0,0400             | 0,00793         | 0,00050          | 15,92998         | 3267,58    | 3225,81      | 3182,09      |
| 12 | 0,6436         | 0,1436                  | 0,0500             | 0,01122         | 0,00050          | 22,54092         | 3266,89    | 3225,13      | 3181,01      |
| 13 | 0,7136         | 0,2136                  | 0,0700             | 0,01505         | 0,00050          | 30,23985         | 3266,5     | 3224,64      | 3180,33      |
| 14 | 0,8036         | 0,3036                  | 0,0900             | 0,01900         | 0,00050          | 38,16762         | 3265,43    | 3223,86      | 3179,45      |
| 15 | 0,9036         | 0,4036                  | 0,1000             | 0,02246         | 0,00050          | 45,12407         | 3264,94    | 3223,27      | 3178,67      |
| 16 | 1,0036         | 0,5036                  | 0,1000             | 0,02523         | 0,00050          | 50,69421         | 3264,35    | 3222,58      | 3177,88      |

K  
Error

0,17 M<sup>-1</sup>  
0,00635035 M<sup>-1</sup>

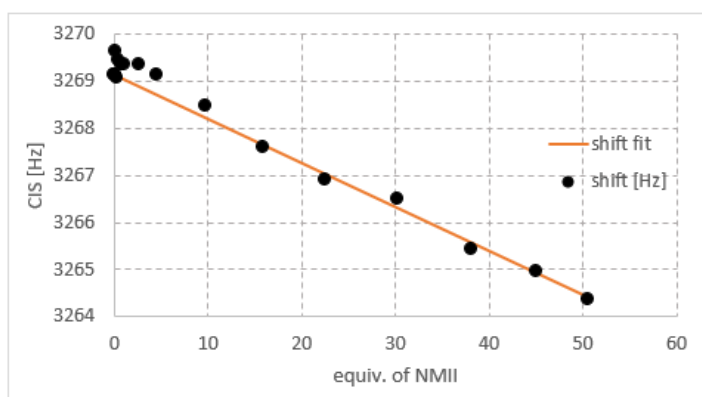

**Figure S40:** <sup>1</sup>H NMR titration of compound **7d** with NMII (C<sub>2</sub>D<sub>2</sub>Cl<sub>4</sub>, 400 MHz).

Calixarene **7d** was dissolved in a specified amount of C<sub>2</sub>D<sub>2</sub>Cl<sub>4</sub>. 0.5 ml of calixarene solution was put in an NMR tube. To the calixarene solution (0.6 ml), a specific amount of *N*-methylpyridinium iodide (NMPI) was added. The aliquots of NMPI were gradually added to the NMR tube to achieve different calixarene/guest ratios (1:0.000-49.634), ensuring constant host concentration during the experiment. The complexation constant was determined by analyzing CIS of host protons using nonlinear curve-fitting procedure (program BindFit).

|                                                        |                 |                                                        |               |
|--------------------------------------------------------|-----------------|--------------------------------------------------------|---------------|
| M(NMPI)                                                | 221,04147 g/mol | M(calix)                                               | 739,953 g/mol |
| m(NMPI)                                                | 0,00653 g       | m(calix)                                               | 0,00221 g     |
| c(NMPI)                                                | 0,04924 mol/l   | c(calix)                                               | 0,00050 mol/l |
| V(C <sub>2</sub> D <sub>2</sub> Cl <sub>4</sub> _NMPI) | 0,6 ml          | V(C <sub>2</sub> D <sub>2</sub> Cl <sub>4</sub> _cali) | 6 ml          |

|    | V (total) [ml] | V(addition, total) [ml] | n V(addition) [ml] | c(NMPI) [mol/l] | c(calix) [mol/l] | c(calix)/c(NM) | shift [Hz] | shift 2 [Hz] | shift 3 [Hz] |
|----|----------------|-------------------------|--------------------|-----------------|------------------|----------------|------------|--------------|--------------|
| 1  | 0,5000         | 0,0000                  | 0,0000             | 0,00000         | 0,00050          | 0,00000        | 3276,87    | 3268,95      | 3184,24      |
| 2  | 0,5006         | 0,0006                  | 0,0006             | 0,00006         | 0,00050          | 0,11855        | 3276,97    | 3269,24      | 3184,24      |
| 3  | 0,5012         | 0,0012                  | 0,0006             | 0,00012         | 0,00050          | 0,23682        | 3277,26    | 3269,24      | 3184,34      |
| 4  | 0,5020         | 0,0020                  | 0,0008             | 0,00020         | 0,00050          | 0,39407        | 3277,16    | 3269,44      | 3184,44      |
| 5  | 0,5028         | 0,0028                  | 0,0008             | 0,00027         | 0,00050          | 0,55083        | 3276,67    | 3269,63      | 3184,34      |
| 6  | 0,5042         | 0,0042                  | 0,0014             | 0,00041         | 0,00050          | 0,82394        | 3276,77    | 3269,05      | 3183,95      |
| 7  | 0,5056         | 0,0056                  | 0,0014             | 0,00055         | 0,00050          | 1,09555        | 3277,07    | 3269,34      | 3184,14      |
| 8  | 0,5136         | 0,0136                  | 0,0080             | 0,00130         | 0,00050          | 2,61918        | 3278,26    | 3268,75      | 3183,65      |
| 9  | 0,5236         | 0,0236                  | 0,0100             | 0,00222         | 0,00050          | 4,45824        | 3279,41    | 3267,97      | 3182,87      |
| 10 | 0,5536         | 0,0536                  | 0,0300             | 0,00477         | 0,00050          | 9,57679        | 3280,00    | 3266,70      | 3181,50      |
| 11 | 0,5936         | 0,0936                  | 0,0400             | 0,00776         | 0,00050          | 15,59672       | 3280,98    | 3265,23      | 3180,23      |
| 12 | 0,6436         | 0,1436                  | 0,0500             | 0,01099         | 0,00050          | 22,06936       | 3281,47    | 3264,06      | 3178,86      |
| 13 | 0,7136         | 0,2136                  | 0,0700             | 0,01474         | 0,00050          | 29,60722       | 3282,64    | 3262,39      | 3177,10      |
| 14 | 0,8036         | 0,3036                  | 0,0900             | 0,01860         | 0,00050          | 37,36914       | 3283,52    | 3261,12      | 3176,03      |
| 15 | 0,9036         | 0,4036                  | 0,1000             | 0,02199         | 0,00050          | 44,18005       | 3284,01    | 3260,24      | 3174,66      |
| 16 | 1,0036         | 0,5036                  | 0,1000             | 0,02471         | 0,00050          | 49,63367       | 3284,50    | 3258,77      | 3173,87      |

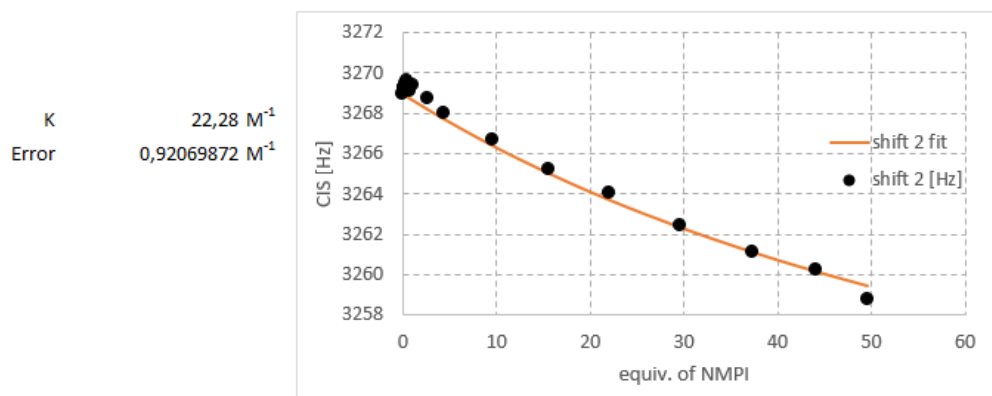

**Figure S41:** <sup>1</sup>H NMR titration of compound **7d** with NMPI (C<sub>2</sub>D<sub>2</sub>Cl<sub>4</sub>, 400 MHz).

Calixarene **7d** was dissolved in a specified amount of  $C_2D_2Cl_4$ . 0.5 ml of calixarene solution was put in an NMR tube. To the calixarene solution (0.6 ml), a specific amount of *N*-methylquinolinium iodide (NMQI) was added. The aliquots of NMQI were gradually added to the NMR tube to achieve different calixarene/guest ratios (1:0.000-50.446), ensuring constant host concentration during the experiment. The complexation constant was determined by analyzing CIS of host protons using nonlinear curve-fitting procedure (program BindFit).

|                        |                 |                        |               |
|------------------------|-----------------|------------------------|---------------|
| M(NMQI)                | 271,10147 g/mol | M(calix)               | 739,953 g/mol |
| m(NMQI)                | 0,00814 g       | m(calix)               | 0,00221 g     |
| c(NMQI)                | 0,05004 mol/l   | c(calix)               | 0,00050 mol/l |
| V( $C_2D_2Cl_4$ _NMQI) | 0,6 ml          | V( $C_2D_2Cl_4$ _cali) | 6 ml          |

|    | V (total) [ml] | V(addition, total) [ml] | n V(addition) [ml] | c(NMQI) [mol/l] | c(calix) [mol/l] | c(calix)/c(NM shift [Hz] |
|----|----------------|-------------------------|--------------------|-----------------|------------------|--------------------------|
| 1  | 0,5000         | 0,0000                  | 0,0000             | 0,00000         | 0,00050          | 0,00000 3184,24          |
| 2  | 0,5006         | 0,0006                  | 0,0006             | 0,00006         | 0,00050          | 0,12049 3184,24          |
| 3  | 0,5012         | 0,0012                  | 0,0006             | 0,00012         | 0,00050          | 0,24070 3184,44          |
| 4  | 0,5020         | 0,0020                  | 0,0008             | 0,00020         | 0,00050          | 0,40053 3184,44          |
| 5  | 0,5028         | 0,0028                  | 0,0008             | 0,00028         | 0,00050          | 0,55984 3184,34          |
| 6  | 0,5042         | 0,0042                  | 0,0014             | 0,00042         | 0,00050          | 0,83743 3183,75          |
| 7  | 0,5056         | 0,0056                  | 0,0014             | 0,00055         | 0,00050          | 1,11349 3183,95          |
| 8  | 0,5136         | 0,0136                  | 0,0080             | 0,00133         | 0,00050          | 2,66206 3184,14          |
| 9  | 0,5236         | 0,0236                  | 0,0100             | 0,00226         | 0,00050          | 4,53124 3183,56          |
| 10 | 0,5536         | 0,0536                  | 0,0300             | 0,00485         | 0,00050          | 9,73359 3182,19          |
| 11 | 0,5936         | 0,0936                  | 0,0400             | 0,00789         | 0,00050          | 15,85208 3181,21         |
| 12 | 0,6436         | 0,1436                  | 0,0500             | 0,01117         | 0,00050          | 22,43070 3180,23         |
| 13 | 0,7136         | 0,2136                  | 0,0700             | 0,01498         | 0,00050          | 30,09198 3179,06         |
| 14 | 0,8036         | 0,3036                  | 0,0900             | 0,01891         | 0,00050          | 37,98099 3177,88         |
| 15 | 0,9036         | 0,4036                  | 0,1000             | 0,02235         | 0,00050          | 44,90341 3177,10         |
| 16 | 1,0036         | 0,5036                  | 0,1000             | 0,02511         | 0,00050          | 50,44632 3176,42         |

K                    12,89  $M^{-1}$   
 Error                0,50401189  $M^{-1}$

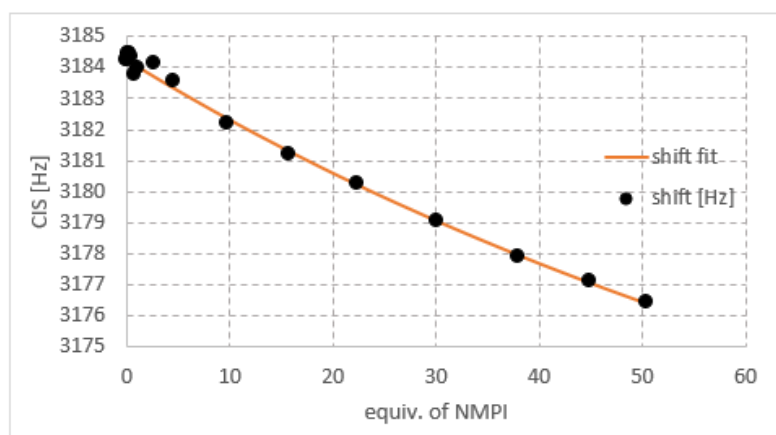

**Figure S42:**  $^1H$  NMR titration of compound **7d** with NMQI ( $C_2D_2Cl_4$ , 400 MHz).

## 5. Theoretical calculations

DFT scan (B3LYP/6-31G+)<sup>1</sup> of the rotation around the N-C(=O) bond for **7a** and **8a/8b** revealed three possible ways of how this rotation can happen: a) The carbonyl group bends out of the cavity, resulting in the nitrogen atom adopting classical sp<sup>3</sup> hybridization. In this conformation, the rotation around the N-C(=O) bond is not significantly prevented and, thus, the carbonyl part of the molecule can rotate. b) Either the carbonyl oxygen or the methyl of the carbonyl group moves inside the cavity and escapes it on the opposite side. c) A combination of the other two consists in bending the carbonyl group out of the cavity, half-rotation, bending back, which results in the presence of the carbonyl oxygen or the methyl in the cavity, and the finalization of the rotation (or *vice versa*). However, although all the three ways are potentially possible, the calculations did not reveal a simple way for the rotation by either a) or b) mechanism: in the calculated maxima, the geometry always transformed from the a)-like structure to the b)-like structure (or *vice versa*). Thus, the c) mechanism is the most probable one.

In the case of **7a**, the rotation is less energetically demanding when the carbonyl oxygen rotates above the cavity (i.e. the methyl rotates in the close proximity to the bridging methylene): the energy difference between these rotations is ca. 20 kJ/mol. In the more favoured case, the energetic maximum of the rotation is represented by the transition state for the interconversion between the a)-like and the b)-like structure (calculated relative energy 67.6 kJ/mol, which is in a good agreement with the experimental 62 kJ/mol, Figure S43).

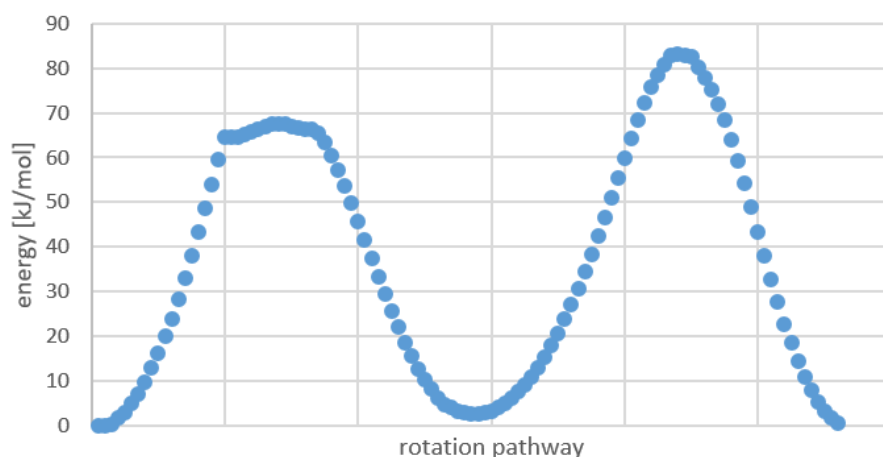

**Figure S43:** Rotation pathway for compound **7a**

Conversely, in the case of **8a/8b**, the energy difference for the oxygen-above-cavity and methyl-above-cavity rotation is small (ca. 4 kJ/mol in favour to methyl-above-cavity pathway). This may be caused by the destabilization of the structure when the bromine and the oxygen atom get to a close proximity. The calculated activation energy for the methyl-above-cavity rotation is ca. 86 kJ/mol (Figure S44). As

expected from the NMR studies, the calculated activation energy for this rotation is much higher to that for the rotation of **7a**. This value also shows, that **8a/8b** can be described as atropisomers (it exceeds the value 83.6 kJ/mol generally considered as the border of atropisomerism at room temperature<sup>2</sup>).

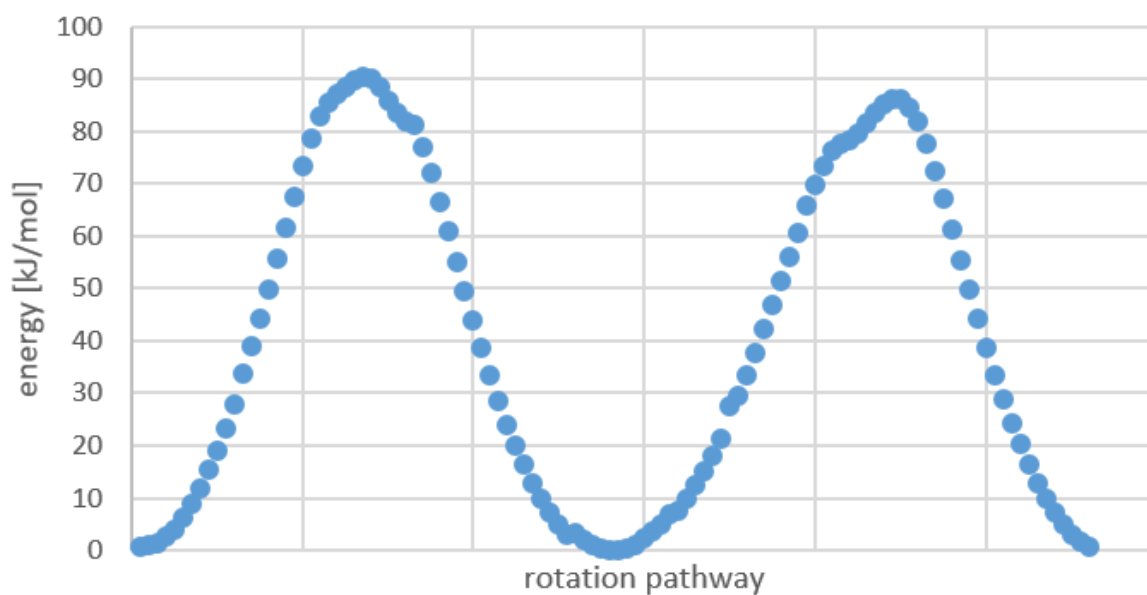

**Figure S44:** Rotation pathway for compounds **8a/8b** (B3LYP/6-31G+)

**Table S1:** Energies calculated by scan of dihedral angle values of **7a** (B3LYP/6-31G+, clockwise rotation calculated)

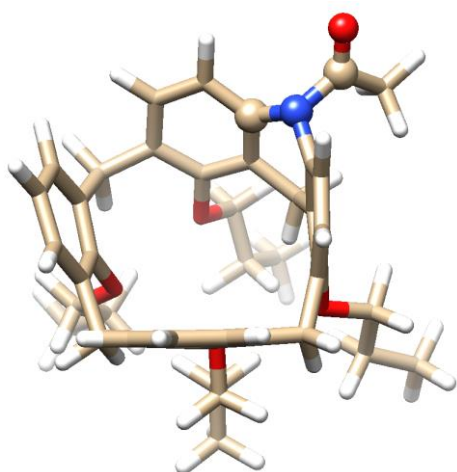

| dihedral angle | energy [a.u.] | energy [kJ/mol] | relative energy [kJ/mol] |
|----------------|---------------|-----------------|--------------------------|
| 0.18           | -2060.358896  | -5408442        | 0.0735                   |
| 4.18           | -2060.358924  | -5408442        | 0                        |
| 8.18           | -2060.35876   | -5408442        | 0.4305                   |
| 12.18          | -2060.358253  | -5408440        | 1.761375                 |

|        |              |          |          |
|--------|--------------|----------|----------|
| 16.18  | -2060.357737 | -5408439 | 3.115875 |
| 20.18  | -2060.357053 | -5408437 | 4.911375 |
| 24.18  | -2060.356207 | -5408435 | 7.132125 |
| 28.18  | -2060.355197 | -5408432 | 9.783375 |
| 32.18  | -2060.354026 | -5408429 | 12.85725 |
| 36.18  | -2060.352712 | -5408426 | 16.3065  |
| 40.18  | -2060.351261 | -5408422 | 20.11538 |
| 44.18  | -2060.349807 | -5408418 | 23.93212 |
| 48.18  | -2060.348114 | -5408414 | 28.37625 |
| 52.18  | -2060.346318 | -5408409 | 33.09075 |
| 56.18  | -2060.344429 | -5408404 | 38.04937 |
| 60.18  | -2060.342459 | -5408399 | 43.22063 |
| 64.18  | -2060.340427 | -5408394 | 48.55462 |
| 68.18  | -2060.338355 | -5408388 | 53.99363 |
| 72.18  | -2060.336287 | -5408383 | 59.42212 |
| 76.18  | -2060.334323 | -5408378 | 64.57762 |
| 80.18  | -2060.332555 | -5408373 | 69.21862 |
| 84.18  | -2060.330978 | -5408369 | 73.35825 |
| 88.18  | -2060.335869 | -5408382 | 60.51938 |
| 92.18  | -2060.337101 | -5408385 | 57.28537 |
| 96.18  | -2060.33846  | -5408388 | 53.718   |
| 100.18 | -2060.339912 | -5408392 | 49.9065  |
| 104.18 | -2060.341554 | -5408397 | 45.59625 |
| 108.18 | -2060.343109 | -5408401 | 41.51438 |
| 112.18 | -2060.344669 | -5408405 | 37.41937 |
| 116.18 | -2060.346204 | -5408409 | 33.39    |
| 120.18 | -2060.347698 | -5408413 | 29.46825 |
| 124.18 | -2060.349141 | -5408416 | 25.68037 |
| 128.18 | -2060.350512 | -5408420 | 22.0815  |
| 132.18 | -2060.351793 | -5408423 | 18.71888 |
| 136.18 | -2060.352976 | -5408427 | 15.6135  |
| 140.18 | -2060.354051 | -5408429 | 12.79163 |
| 144.18 | -2060.355004 | -5408432 | 10.29    |
| 148.18 | -2060.355825 | -5408434 | 8.134875 |
| 152.18 | -2060.356511 | -5408436 | 6.334125 |
| 156.18 | -2060.357069 | -5408437 | 4.869375 |
| 160.18 | -2060.357332 | -5408438 | 4.179    |
| 164.18 | -2060.357638 | -5408439 | 3.37575  |
| 168.18 | -2060.357817 | -5408439 | 2.905875 |
| 172.18 | -2060.357874 | -5408439 | 2.75625  |
| 176.18 | -2060.357818 | -5408439 | 2.90325  |
| 180.18 | -2060.357655 | -5408439 | 3.331125 |
| 184.18 | -2060.35739  | -5408438 | 4.02675  |
| 188.18 | -2060.35703  | -5408437 | 4.97175  |
| 192.18 | -2060.356579 | -5408436 | 6.155625 |
| 196.18 | -2060.356043 | -5408435 | 7.562625 |

|        |              |          |          |
|--------|--------------|----------|----------|
| 200.18 | -2060.355429 | -5408433 | 9.174375 |
| 204.18 | -2060.354729 | -5408431 | 11.01187 |
| 208.18 | -2060.353938 | -5408429 | 13.08825 |
| 212.18 | -2060.353055 | -5408427 | 15.40612 |
| 216.18 | -2060.352083 | -5408424 | 17.95762 |
| 220.18 | -2060.351021 | -5408421 | 20.74537 |
| 224.18 | -2060.349861 | -5408418 | 23.79037 |
| 228.18 | -2060.348602 | -5408415 | 27.09525 |
| 232.18 | -2060.347242 | -5408412 | 30.66525 |
| 236.18 | -2060.34583  | -5408408 | 34.37175 |
| 240.18 | -2060.344332 | -5408404 | 38.304   |
| 244.18 | -2060.342763 | -5408400 | 42.42262 |
| 248.18 | -2060.341142 | -5408395 | 46.67775 |
| 252.18 | -2060.339491 | -5408391 | 51.01162 |
| 256.18 | -2060.337821 | -5408387 | 55.39537 |
| 260.18 | -2060.336144 | -5408382 | 59.7975  |
| 264.18 | -2060.334485 | -5408378 | 64.15238 |
| 268.18 | -2060.332883 | -5408374 | 68.35763 |
| 272.18 | -2060.331375 | -5408370 | 72.31612 |
| 276.18 | -2060.330002 | -5408366 | 75.92025 |
| 280.18 | -2060.328812 | -5408363 | 79.044   |
| 284.18 | -2060.327868 | -5408361 | 81.522   |
| 288.18 | -2060.32725  | -5408359 | 83.14425 |
| 292.18 | -2060.327072 | -5408359 | 83.6115  |
| 296.18 | -2060.336366 | -5408383 | 59.21475 |
| 300.18 | -2060.338301 | -5408388 | 54.13538 |
| 304.18 | -2060.340327 | -5408393 | 48.81713 |
| 308.18 | -2060.342384 | -5408399 | 43.4175  |
| 312.18 | -2060.344422 | -5408404 | 38.06775 |
| 316.18 | -2060.346411 | -5408409 | 32.84663 |
| 320.18 | -2060.348315 | -5408414 | 27.84862 |
| 324.18 | -2060.35024  | -5408419 | 22.7955  |
| 328.18 | -2060.351895 | -5408424 | 18.45113 |
| 332.18 | -2060.3534   | -5408428 | 14.5005  |
| 336.18 | -2060.354743 | -5408431 | 10.97512 |
| 340.18 | -2060.355908 | -5408434 | 7.917    |
| 344.18 | -2060.356884 | -5408437 | 5.355    |
| 348.18 | -2060.357669 | -5408439 | 3.294375 |
| 352.18 | -2060.358267 | -5408440 | 1.724625 |
| 356.18 | -2060.358677 | -5408442 | 0.648375 |

**Table S2:** Energies calculated by scan of dihedral angle values of **7a** (B3LYP/6-31G+, anticlockwise rotation calculated)

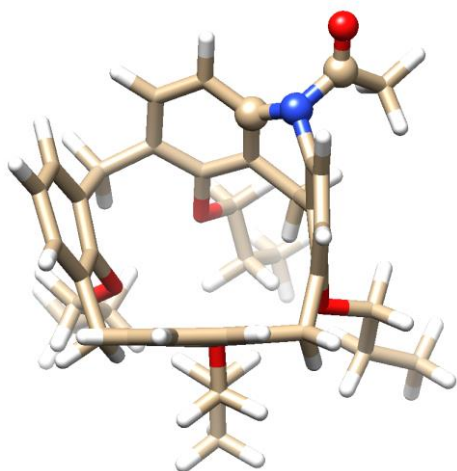

| dihedral angle | energy [a.u.] | energy [kJ/mol] | relative energy [kJ/mol] |
|----------------|---------------|-----------------|--------------------------|
| 0.18           | -2060.36      | -5408442        | 0.0735                   |
| 4.18           | -2060.36      | -5408442        | 0                        |
| 8.18           | -2060.36      | -5408442        | 0.4305                   |
| 12.18          | -2060.36      | -5408440        | 1.761375                 |
| 16.18          | -2060.36      | -5408439        | 3.115875                 |
| 20.18          | -2060.36      | -5408437        | 4.911375                 |
| 24.18          | -2060.36      | -5408435        | 7.132125                 |
| 28.18          | -2060.36      | -5408432        | 9.783375                 |
| 32.18          | -2060.35      | -5408429        | 12.85725                 |
| 36.18          | -2060.35      | -5408426        | 16.3065                  |
| 40.18          | -2060.35      | -5408422        | 20.11538                 |
| 44.18          | -2060.35      | -5408418        | 23.93212                 |
| 48.18          | -2060.35      | -5408414        | 28.37625                 |
| 52.18          | -2060.35      | -5408409        | 33.09075                 |
| 56.18          | -2060.34      | -5408404        | 38.04937                 |
| 60.18          | -2060.34      | -5408399        | 43.22063                 |
| 64.18          | -2060.34      | -5408394        | 48.55462                 |
| 68.18          | -2060.34      | -5408388        | 53.99363                 |
| 72.18          | -2060.34      | -5408383        | 59.42212                 |
| 76.18          | -2060.33      | -5408376        | 66.255                   |
| 80.18          | -2060.33      | -5408377        | 65.352                   |
| 84.18          | -2060.33      | -5408379        | 63.25988                 |
| 88.18          | -2060.34      | -5408382        | 60.51938                 |
| 92.18          | -2060.34      | -5408385        | 57.28537                 |
| 96.18          | -2060.34      | -5408388        | 53.718                   |
| 100.18         | -2060.34      | -5408392        | 49.9065                  |
| 104.18         | -2060.34      | -5408397        | 45.59625                 |
| 108.18         | -2060.34      | -5408401        | 41.51438                 |
| 112.18         | -2060.34      | -5408405        | 37.41937                 |
| 116.18         | -2060.35      | -5408409        | 33.39                    |



|        |          |          |          |
|--------|----------|----------|----------|
| 120.18 | -2060.35 | -5408413 | 29.46825 |
| 124.18 | -2060.35 | -5408416 | 25.68037 |
| 128.18 | -2060.35 | -5408420 | 22.0815  |
| 132.18 | -2060.35 | -5408423 | 18.71888 |
| 136.18 | -2060.35 | -5408427 | 15.6135  |
| 140.18 | -2060.35 | -5408429 | 12.79163 |
| 144.18 | -2060.36 | -5408432 | 10.29    |
| 148.18 | -2060.36 | -5408434 | 8.134875 |
| 152.18 | -2060.36 | -5408436 | 6.334125 |
| 156.18 | -2060.36 | -5408437 | 4.869375 |
| 160.18 | -2060.36 | -5408438 | 4.179    |
| 164.18 | -2060.36 | -5408439 | 3.37575  |
| 168.18 | -2060.36 | -5408439 | 2.905875 |
| 172.18 | -2060.36 | -5408439 | 2.75625  |
| 176.18 | -2060.36 | -5408439 | 2.90325  |
| 180.18 | -2060.36 | -5408439 | 3.331125 |
| 184.18 | -2060.36 | -5408438 | 4.02675  |
| 188.18 | -2060.36 | -5408437 | 4.97175  |
| 192.18 | -2060.36 | -5408436 | 6.155625 |
| 196.18 | -2060.36 | -5408435 | 7.562625 |
| 200.18 | -2060.36 | -5408433 | 9.174375 |
| 204.18 | -2060.35 | -5408431 | 11.01187 |
| 208.18 | -2060.35 | -5408429 | 13.08825 |
| 212.18 | -2060.35 | -5408427 | 15.40612 |
| 216.18 | -2060.35 | -5408424 | 17.95762 |
| 220.18 | -2060.35 | -5408421 | 20.74537 |
| 224.18 | -2060.35 | -5408418 | 23.79037 |
| 228.18 | -2060.35 | -5408415 | 27.09525 |
| 232.18 | -2060.35 | -5408412 | 30.66525 |
| 236.18 | -2060.35 | -5408408 | 34.37175 |
| 240.18 | -2060.34 | -5408404 | 38.304   |
| 244.18 | -2060.34 | -5408400 | 42.42525 |
| 248.18 | -2060.34 | -5408395 | 46.67775 |
| 252.18 | -2060.34 | -5408391 | 51.01162 |
| 256.18 | -2060.33 | -5408359 | 82.6875  |
| 260.18 | -2060.33 | -5408360 | 82.62188 |
| 264.18 | -2060.33 | -5408360 | 82.089   |
| 268.18 | -2060.33 | -5408361 | 81.26212 |
| 272.18 | -2060.33 | -5408362 | 80.14912 |
| 276.18 | -2060.33 | -5408364 | 77.8785  |
| 280.18 | -2060.33 | -5408367 | 75.20363 |
| 284.18 | -2060.33 | -5408370 | 71.841   |
| 288.18 | -2060.33 | -5408374 | 68.33138 |
| 292.18 | -2060.33 | -5408378 | 63.98437 |
| 296.18 | -2060.34 | -5408383 | 59.21475 |
| 300.18 | -2060.34 | -5408388 | 54.13538 |

|        |          |          |          |
|--------|----------|----------|----------|
| 304.18 | -2060.34 | -5408393 | 48.81713 |
| 308.18 | -2060.34 | -5408399 | 43.4175  |
| 312.18 | -2060.34 | -5408404 | 38.06775 |
| 316.18 | -2060.35 | -5408409 | 32.84663 |
| 320.18 | -2060.35 | -5408414 | 27.84862 |
| 324.18 | -2060.35 | -5408419 | 22.7955  |
| 328.18 | -2060.35 | -5408424 | 18.45113 |
| 332.18 | -2060.35 | -5408428 | 14.5005  |
| 336.18 | -2060.35 | -5408431 | 10.97512 |
| 340.18 | -2060.36 | -5408434 | 7.917    |
| 344.18 | -2060.36 | -5408437 | 5.355    |
| 348.18 | -2060.36 | -5408439 | 3.294375 |
| 352.18 | -2060.36 | -5408440 | 1.724625 |
| 356.18 | -2060.36 | -5408442 | 0.648375 |

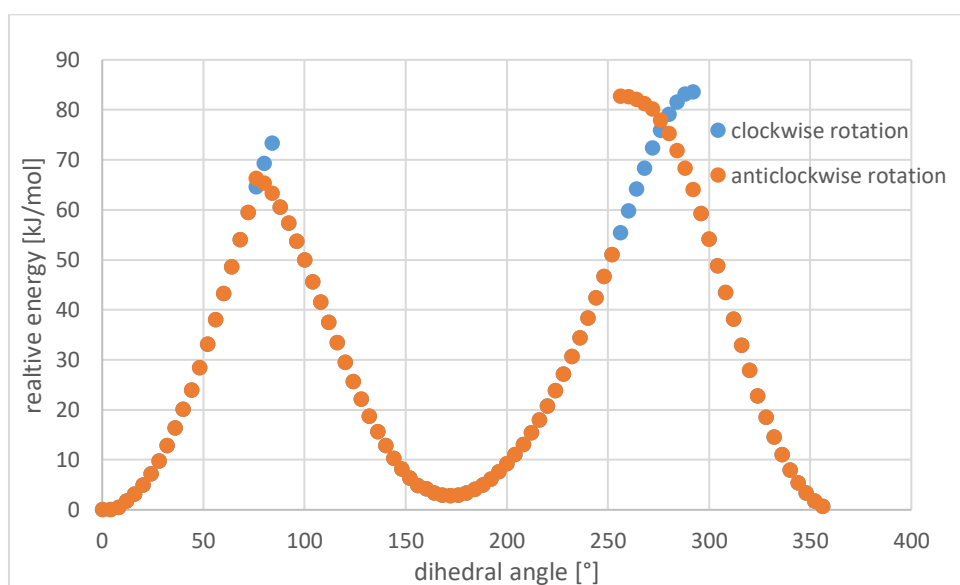

**Figure S45:** Comparison of clockwise and anticlockwise rotation calculation (compound **7a**)

**Table S3:** Energies calculated by scan of dihedral angle values of **8a/8b** (B3LYP/6-31G+, anticlockwise rotation calculated)

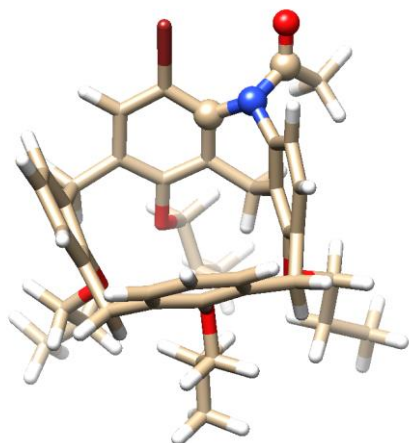

| dihedral angle | energy [a.u.] | energy [kJ/mol] | relative energy [kJ/mol] |
|----------------|---------------|-----------------|--------------------------|
| 0.8111         | -4631.366896  | -12157338.1     | 0.847875                 |
| 4.8111         | -4631.366884  | -12157338.07    | 0.879375                 |
| 8.8111         | -4631.366675  | -12157337.52    | 1.428                    |
| 12.8111        | -4631.366264  | -12157336.44    | 2.506875                 |
| 16.8111        | -4631.365664  | -12157334.87    | 4.081875                 |
| 20.8111        | -4631.364868  | -12157332.78    | 6.171375                 |
| 24.81082       | -4631.36388   | -12157330.19    | 8.764875                 |
| 28.81082       | -4631.362723  | -12157327.15    | 11.802                   |
| 32.81082       | -4631.361402  | -12157323.68    | 15.26962                 |
| 36.81082       | -4631.359926  | -12157319.81    | 19.14412                 |
| 40.81017       | -4631.35831   | -12157315.56    | 23.38613                 |
| 44.81017       | -4631.356563  | -12157310.98    | 27.972                   |
| 48.81017       | -4631.354338  | -12157305.14    | 33.81262                 |
| 52.81017       | -4631.352378  | -12157299.99    | 38.95762                 |
| 56.81017       | -4631.350327  | -12157294.61    | 44.3415                  |
| 60.81017       | -4631.348194  | -12157289.01    | 49.94062                 |
| 64.81017       | -4631.345991  | -12157283.23    | 55.7235                  |
| 68.81017       | -4631.343748  | -12157277.34    | 61.61137                 |
| 72.81017       | -4631.341503  | -12157271.45    | 67.5045                  |
| 76.81017       | -4631.339302  | -12157265.67    | 73.28212                 |
| 80.81017       | -4631.337273  | -12157260.34    | 78.60825                 |
| 84.81017       | -4631.335644  | -12157256.07    | 82.88438                 |
| 88.81017       | -4631.334232  | -12157252.36    | 86.59087                 |
| 92.81017       | -4631.333097  | -12157249.38    | 89.57025                 |
| 96.81052       | -4631.341666  | -12157271.87    | 67.07662                 |
| 100.8105       | -4631.343825  | -12157277.54    | 61.40925                 |
| 104.8104       | -4631.346037  | -12157283.35    | 55.60275                 |
| 108.8104       | -4631.348244  | -12157289.14    | 49.80937                 |
| 112.8108       | -4631.35038   | -12157294.75    | 44.20237                 |

|          |              |              |          |
|----------|--------------|--------------|----------|
| 116.8106 | -4631.352352 | -12157299.92 | 39.02587 |
| 120.8106 | -4631.354312 | -12157305.07 | 33.88087 |
| 124.8106 | -4631.356152 | -12157309.9  | 29.05087 |
| 128.8106 | -4631.35786  | -12157314.38 | 24.56737 |
| 132.8106 | -4631.359427 | -12157318.5  | 20.454   |
| 136.8106 | -4631.360847 | -12157322.22 | 16.7265  |
| 140.8106 | -4631.36212  | -12157325.57 | 13.38487 |
| 144.8106 | -4631.363254 | -12157328.54 | 10.40813 |
| 148.8106 | -4631.364254 | -12157331.17 | 7.783125 |
| 152.8106 | -4631.365123 | -12157333.45 | 5.502    |
| 156.8106 | -4631.365858 | -12157335.38 | 3.572625 |
| 160.8106 | -4631.366034 | -12157335.84 | 3.110625 |
| 164.8106 | -4631.36651  | -12157337.09 | 1.861125 |
| 168.8106 | -4631.366868 | -12157338.03 | 0.921375 |
| 172.8106 | -4631.367106 | -12157338.65 | 0.296625 |
| 176.8106 | -4631.367219 | -12157338.95 | 0        |
| 180.8106 | -4631.367203 | -12157338.91 | 0.042    |
| 184.8106 | -4631.367058 | -12157338.53 | 0.422625 |
| 188.8106 | -4631.366787 | -12157337.82 | 1.134    |
| 192.8106 | -4631.366396 | -12157336.79 | 2.160375 |
| 196.8106 | -4631.365895 | -12157335.47 | 3.4755   |
| 200.8106 | -4631.365298 | -12157333.91 | 5.042625 |
| 204.8106 | -4631.364617 | -12157332.12 | 6.83025  |
| 208.8106 | -4631.364296 | -12157331.28 | 7.672875 |
| 212.811  | -4631.363414 | -12157328.96 | 9.988125 |
| 216.811  | -4631.362479 | -12157326.51 | 12.4425  |
| 220.811  | -4631.361434 | -12157323.76 | 15.18562 |
| 224.811  | -4631.360287 | -12157320.75 | 18.1965  |
| 228.8108 | -4631.359044 | -12157317.49 | 21.45937 |
| 232.8108 | -4631.356749 | -12157311.47 | 27.48375 |
| 236.8108 | -4631.356027 | -12157309.57 | 29.379   |
| 240.8108 | -4631.354488 | -12157305.53 | 33.41887 |
| 244.8108 | -4631.352863 | -12157301.27 | 37.6845  |
| 248.8108 | -4631.351168 | -12157296.82 | 42.13387 |
| 252.8108 | -4631.349416 | -12157292.22 | 46.73287 |
| 256.8108 | -4631.347635 | -12157287.54 | 51.408   |
| 260.8108 | -4631.345853 | -12157282.86 | 56.08575 |
| 264.8108 | -4631.344104 | -12157278.27 | 60.67687 |
| 268.8108 | -4631.342178 | -12157273.22 | 65.73263 |
| 272.8108 | -4631.340617 | -12157269.12 | 69.83025 |
| 276.8108 | -4631.339239 | -12157265.5  | 73.4475  |
| 280.8108 | -4631.338134 | -12157262.6  | 76.34812 |
| 284.8108 | -4631.33742  | -12157260.73 | 78.22237 |
| 288.8108 | -4631.337437 | -12157260.77 | 78.17775 |
| 292.8108 | -4631.343667 | -12157277.13 | 61.824   |
| 296.8108 | -4631.345886 | -12157282.95 | 55.99912 |

|          |              |              |          |
|----------|--------------|--------------|----------|
| 300.8108 | -4631.34809  | -12157288.74 | 50.21362 |
| 304.8108 | -4631.350242 | -12157294.39 | 44.56462 |
| 308.8108 | -4631.352302 | -12157299.79 | 39.15712 |
| 312.8108 | -4631.354242 | -12157304.89 | 34.06462 |
| 316.8111 | -4631.356059 | -12157309.65 | 29.295   |
| 320.8111 | -4631.357756 | -12157314.11 | 24.84037 |
| 324.8111 | -4631.359329 | -12157318.24 | 20.71125 |
| 328.8111 | -4631.360779 | -12157322.04 | 16.905   |
| 332.8111 | -4631.362102 | -12157325.52 | 13.43212 |
| 336.8111 | -4631.363277 | -12157328.6  | 10.34775 |
| 340.8111 | -4631.364293 | -12157331.27 | 7.68075  |
| 344.8111 | -4631.365149 | -12157333.52 | 5.43375  |
| 348.8111 | -4631.365844 | -12157335.34 | 3.609375 |
| 352.8111 | -4631.366369 | -12157336.72 | 2.23125  |
| 356.8111 | -4631.366719 | -12157337.64 | 1.3125   |

**Table S4:** Energies calculated by scan of dihedral angle values of **8a/8b** (B3LYP/6-31G+, anticlockwise rotation calculated)

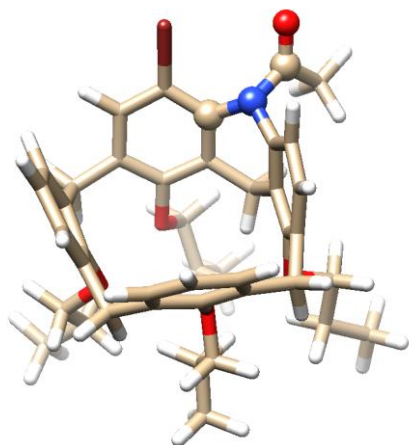

| dihedral angle | energy [a.u.] | energy [kJ/mol] | relative energy [kJ/mol] |
|----------------|---------------|-----------------|--------------------------|
| 0.81           | -4631.366896  | -12157338.1     | 0.364874998              |
| 4.81           | -4631.366884  | -12157338.07    | 0.396375                 |
| 8.81           | -4631.366675  | -12157337.52    | 0.944999998              |
| 12.81          | -4631.366264  | -12157336.44    | 2.023875                 |
| 16.81          | -4631.365664  | -12157334.87    | 3.598874999              |
| 20.81          | -4631.364868  | -12157332.78    | 5.688375                 |
| 24.81          | -4631.36388   | -12157330.19    | 8.281874999              |
| 28.81          | -4631.330796  | -12157243.34    | 95.127375                |
| 32.81          | -4631.331148  | -12157244.26    | 94.203375                |
| 36.81          | -4631.331377  | -12157244.86    | 93.60225                 |
| 40.81          | -4631.331504  | -12157245.2     | 93.268875                |
| 44.81          | -4631.331801  | -12157245.98    | 92.48925                 |
| 48.81          | -4631.331774  | -12157245.91    | 92.560125                |

|        |              |              |             |
|--------|--------------|--------------|-------------|
| 52.81  | -4631.331707 | -12157245.73 | 92.736      |
| 56.81  | -4631.33165  | -12157245.58 | 92.885625   |
| 60.81  | -4631.331667 | -12157245.63 | 92.841      |
| 64.81  | -4631.331851 | -12157246.11 | 92.358      |
| 68.81  | -4631.33219  | -12157247    | 91.468125   |
| 72.81  | -4631.332748 | -12157248.46 | 90.003375   |
| 76.81  | -4631.333574 | -12157250.63 | 87.835125   |
| 80.81  | -4631.334677 | -12157253.53 | 84.93975    |
| 84.81  | -4631.336063 | -12157257.17 | 81.3015     |
| 88.81  | -4631.337723 | -12157261.52 | 76.944      |
| 92.81  | -4631.339614 | -12157266.49 | 71.980125   |
| 96.81  | -4631.341667 | -12157271.88 | 66.591      |
| 100.81 | -4631.343825 | -12157277.54 | 60.92625    |
| 104.81 | -4631.346038 | -12157283.35 | 55.117125   |
| 108.81 | -4631.348135 | -12157288.85 | 49.6125     |
| 112.81 | -4631.350284 | -12157294.5  | 43.971375   |
| 116.81 | -4631.352353 | -12157299.93 | 38.54025    |
| 120.81 | -4631.354313 | -12157305.07 | 33.39525    |
| 124.81 | -4631.356152 | -12157309.9  | 28.567875   |
| 128.81 | -4631.35786  | -12157314.38 | 24.084375   |
| 132.81 | -4631.359428 | -12157318.5  | 19.968375   |
| 136.81 | -4631.360847 | -12157322.22 | 16.2435     |
| 140.81 | -4631.36212  | -12157325.57 | 12.901875   |
| 144.81 | -4631.363254 | -12157328.54 | 9.925125001 |
| 148.81 | -4631.364255 | -12157331.17 | 7.297499999 |
| 152.81 | -4631.365123 | -12157333.45 | 5.019000001 |
| 156.81 | -4631.365858 | -12157335.38 | 3.089624999 |
| 160.81 | -4631.365742 | -12157335.07 | 3.394125    |
| 164.81 | -4631.36625  | -12157336.41 | 2.060625    |
| 168.81 | -4631.366643 | -12157337.44 | 1.028999999 |
| 172.81 | -4631.366902 | -12157338.12 | 0.349125    |
| 176.81 | -4631.367035 | -12157338.47 | 0           |
| 180.81 | -4631.316296 | -12157205.28 | 133.189875  |
| 184.81 | -4631.31825  | -12157210.41 | 128.060625  |
| 188.81 | -4631.320109 | -12157215.29 | 123.18075   |
| 192.81 | -4631.321823 | -12157219.79 | 118.6815    |
| 196.81 | -4631.323348 | -12157223.79 | 114.678375  |
| 200.81 | -4631.324669 | -12157227.26 | 111.21075   |
| 204.81 | -4631.325778 | -12157230.17 | 108.299625  |
| 208.81 | -4631.326682 | -12157232.54 | 105.926625  |
| 212.81 | -4631.327215 | -12157233.94 | 104.5275    |
| 216.81 | -4631.327722 | -12157235.27 | 103.196625  |
| 220.81 | -4631.328055 | -12157236.14 | 102.3225    |
| 224.81 | -4631.328232 | -12157236.61 | 101.857875  |
| 228.81 | -4631.328582 | -12157237.53 | 100.939125  |
| 232.81 | -4631.32875  | -12157237.97 | 100.498125  |

|        |              |              |             |
|--------|--------------|--------------|-------------|
| 236.81 | -4631.328618 | -12157237.62 | 100.844625  |
| 240.81 | -4631.328072 | -12157236.19 | 102.277875  |
| 244.81 | -4631.327949 | -12157235.87 | 102.60075   |
| 248.81 | -4631.327955 | -12157235.88 | 102.585     |
| 252.81 | -4631.328446 | -12157237.17 | 101.296125  |
| 256.81 | -4631.329118 | -12157238.93 | 99.532125   |
| 260.81 | -4631.329988 | -12157241.22 | 97.248375   |
| 264.81 | -4631.331064 | -12157244.04 | 94.423875   |
| 268.81 | -4631.332363 | -12157247.45 | 91.014      |
| 272.81 | -4631.333895 | -12157251.47 | 86.9925     |
| 276.81 | -4631.335609 | -12157255.97 | 82.49325    |
| 280.81 | -4631.337471 | -12157260.86 | 77.6055     |
| 284.81 | -4631.339477 | -12157266.13 | 72.33975    |
| 288.81 | -4631.341466 | -12157271.35 | 67.118625   |
| 292.81 | -4631.343667 | -12157277.13 | 61.341      |
| 296.81 | -4631.345886 | -12157282.95 | 55.516125   |
| 300.81 | -4631.34809  | -12157288.74 | 49.730625   |
| 304.81 | -4631.350242 | -12157294.39 | 44.081625   |
| 308.81 | -4631.352302 | -12157299.79 | 38.674125   |
| 312.81 | -4631.354242 | -12157304.89 | 33.581625   |
| 316.81 | -4631.356059 | -12157309.65 | 28.812      |
| 320.81 | -4631.357756 | -12157314.11 | 24.357375   |
| 324.81 | -4631.359329 | -12157318.24 | 20.22825    |
| 328.81 | -4631.360779 | -12157322.04 | 16.422      |
| 332.81 | -4631.362102 | -12157325.52 | 12.949125   |
| 336.81 | -4631.363277 | -12157328.6  | 9.86475     |
| 340.81 | -4631.364293 | -12157331.27 | 7.19775     |
| 344.81 | -4631.365149 | -12157333.52 | 4.950749999 |
| 348.81 | -4631.365844 | -12157335.34 | 3.126375001 |
| 352.81 | -4631.366369 | -12157336.72 | 1.748249998 |
| 356.81 | -4631.366719 | -12157337.64 | 0.829500001 |

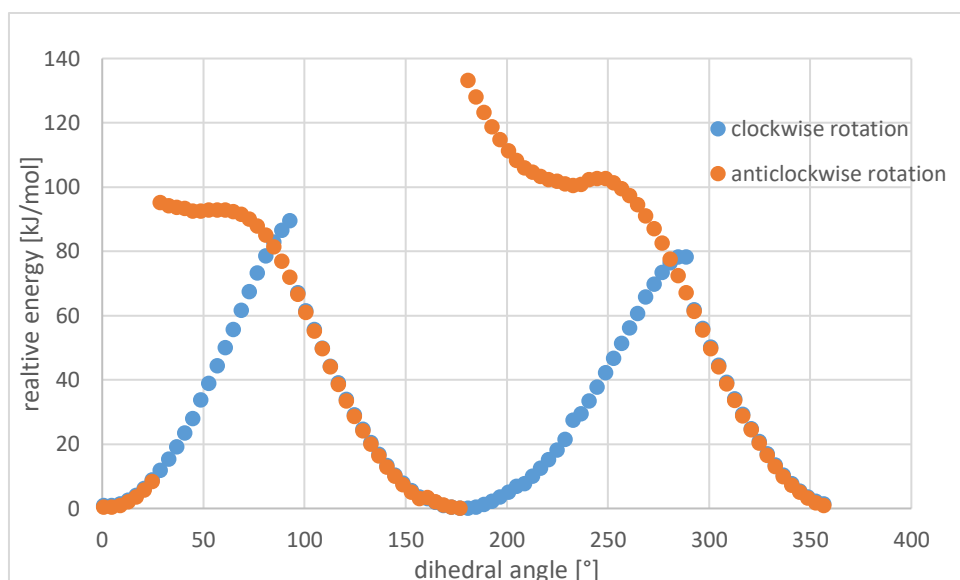

**Figure S46:** Comparison of clockwise and anticlockwise rotation calculation (compounds **8a/8b**)

**Table S5:** Energies calculated by scan of angle values of **7a** (B3LYP/6-31G+, oxygen in the cavity)

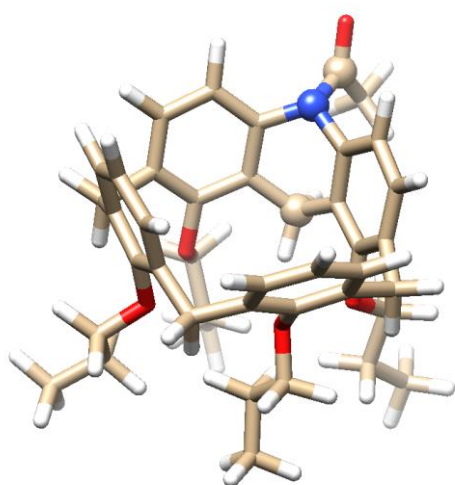

| dihedral angle | energy [a.u.] | energy [kJ/mol] | relative energy [kJ/mol] |
|----------------|---------------|-----------------|--------------------------|
| 163.38         | -2060.33      | -5408376        | 66.255                   |
| 159.38         | -2060.33      | -5408376        | 66.507                   |
| 155.38         | -2060.33      | -5408375        | 67.02412                 |
| 151.38         | -2060.33      | -5408375        | 67.47038                 |
| 147.38         | -2060.33      | -5408375        | 67.59637                 |
| 143.38         | -2060.33      | -5408375        | 67.431                   |
| 139.38         | -2060.33      | -5408375        | 67.00838                 |
| 135.38         | -2060.33      | -5408376        | 66.3915                  |
| 131.38         | -2060.33      | -5408376        | 65.68538                 |
| 127.38         | -2060.33      | -5408377        | 65.04488                 |
| 123.38         | -2060.33      | -5408377        | 64.68262                 |
| 119.38         | -2060.33      | -5408378        | 64.575                   |



**Table S6:** Energies calculated by scan of angle values of **7a** (B3LYP/6-31G+, methyl in the cavity)

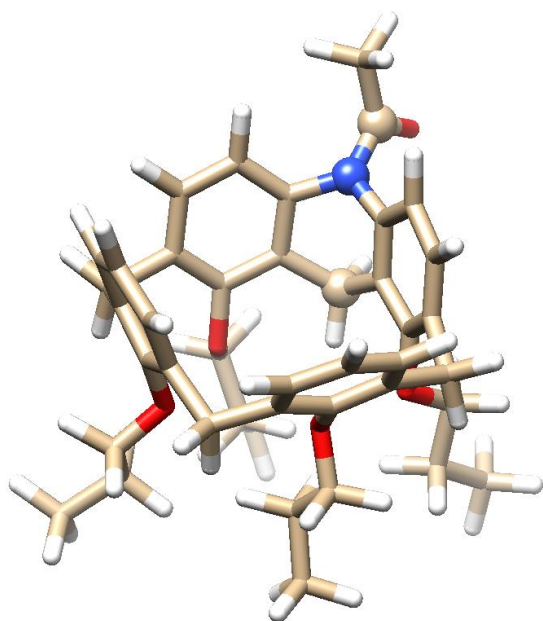

| dihedral angle | energy [a.u.] | energy [kJ/mol] | relative energy [kJ/mol] |
|----------------|---------------|-----------------|--------------------------|
| 160.05         | -2060.327425  | -5408359        | 82.68488                 |
| 156.05         | -2060.327361  | -5408359        | 82.85287                 |
| 152.05         | -2060.327304  | -5408359        | 83.0025                  |
| 148.05         | -2060.327351  | -5408359        | 82.87912                 |
| 144.05         | -2060.327638  | -5408360        | 82.12575                 |
| 140.05         | -2060.328205  | -5408362        | 80.63738                 |
| 136.05         | -2060.329034  | -5408364        | 78.46125                 |
| 132.05         | -2060.330027  | -5408366        | 75.85462                 |
| 128.05         | -2060.331267  | -5408370        | 72.59962                 |

**Table S7:** Energies calculated by scan of angle values of **8a/8b** (B3LYP/6-31G+, oxygen in the cavity)

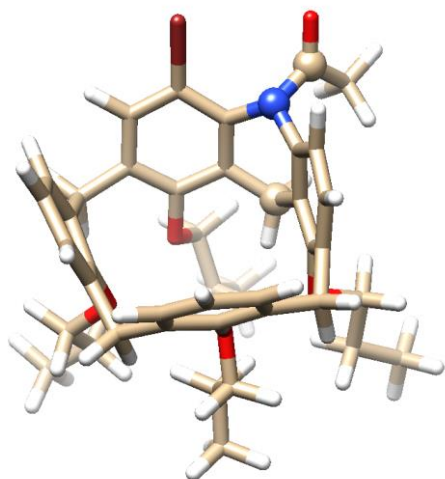

| dihedral angle | energy [a.u.] | energy [kJ/mol] | relative energy [kJ/mol] |
|----------------|---------------|-----------------|--------------------------|
| 109.563        | -4631.335644  | -12157256.07    | 82.40138                 |
| 113.563        | -4631.335805  | -12157256.49    | 81.97875                 |
| 117.563        | -4631.335211  | -12157254.93    | 83.538                   |
| 121.563        | -4631.334348  | -12157252.66    | 85.80337                 |
| 125.563        | -4631.333361  | -12157250.07    | 88.39425                 |
| 129.563        | -4631.332717  | -12157248.38    | 90.08475                 |
| 133.563        | -4631.332625  | -12157248.14    | 90.32625                 |
| 137.563        | -4631.332861  | -12157248.76    | 89.70675                 |
| 141.563        | -4631.333313  | -12157249.95    | 88.52025                 |
| 145.563        | -4631.333861  | -12157251.39    | 87.08175                 |
| 149.563        | -4631.334429  | -12157252.88    | 85.59075                 |
| 153.563        | -4631.334994  | -12157254.36    | 84.10763                 |
| 157.563        | -4631.335603  | -12157255.96    | 82.509                   |

**Table S9:** Energies calculated by scan of angle values of **8a/8b** (B3LYP/6-31G+, methyl in the cavity)

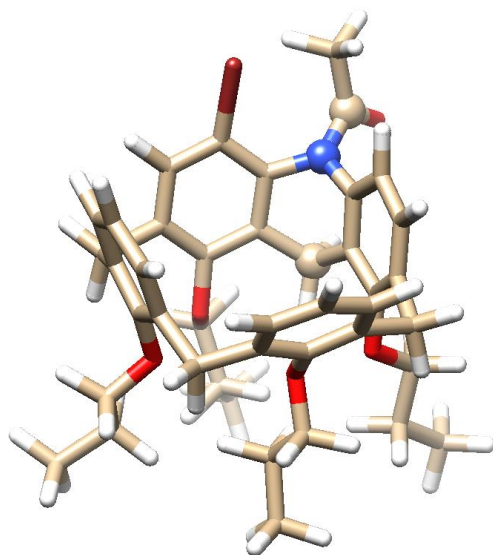

| dihedral angle | energy [a.u.] | energy [kJ/mol] | relative energy [kJ/mol] |
|----------------|---------------|-----------------|--------------------------|
| 112.39         | -4631.335842  | -12157256.59    | 81.881625                |
| 116.39         | -4631.334824  | -12157253.91    | 84.553875                |
| 120.39         | -4631.334221  | -12157252.33    | 86.13675                 |
| 124.39         | -4631.334189  | -12157252.25    | 86.22075                 |
| 128.39         | -4631.334604  | -12157253.34    | 85.131375                |
| 132.39         | -4631.335227  | -12157254.97    | 83.496                   |
| 136.39         | -4631.33598   | -12157256.95    | 81.519375                |
| 140.39         | -4631.33668   | -12157258.79    | 79.681875                |
| 144.39         | -4631.337232  | -12157260.23    | 78.232875                |
| 148.39         | -4631.337471  | -12157260.86    | 77.6055                  |

(1) Gaussian 16, Revision C.01, M. J. Frisch, G. W. Trucks, H. B. Schlegel, G. E. Scuseria, M. A. Robb, J. R. Cheeseman, G. Scalmani, V. Barone, G. A. Petersson, H. Nakatsuji, X. Li, M. Caricato, A. V. Marenich, J. Bloino, B. G. Janesko, R. Gomperts, B. Mennucci, H. P. Hratchian, J. V. Ortiz, A. F. Izmaylov, J. L. Sonnenberg, D. Williams-Young, F. Ding, F. Lipparini, F. Egidi, J. Goings, B. Peng, A. Petrone, T. Henderson, D. Ranasinghe, V. G. Zakrzewski, J. Gao, N. Rega, G. Zheng, W. Liang, M. Hada, M. Ehara, K. Toyota, R. Fukuda, J. Hasegawa, M. Ishida, T. Nakajima, Y. Honda, O. Kitao, H. Nakai, T. Vreven, K. Throssell, J. A. Montgomery, Jr., J. E. Peralta, F. Ogliaro, M. J. Bearpark, J. J. Heyd, E. N. Brothers, K. N. Kudin, V. N. Staroverov, T. A. Keith, R. Kobayashi, J. Normand, K. Raghavachari, A. P. Rendell, J. C. Burant, S. S. Iyengar, J. Tomasi, M. Cossi, J. M. Millam, M. Klene, C. Adamo, R. Cammi, J. W. Ochterski, R. L. Martin, K. Morokuma, O. Farkas, J. B. Foresman, and D. J. Fox, Gaussian, Inc., Wallingford CT, 2016.

(2) S. R. LaPlante, P. J. Edwards, L. D. Fader, A. Jakalian and O. Hucke, *ChemMedChem*, 2011, **6**, 505-513.
